# Supplementary material
Source: ML conference proceedings conference paper supplement (https://aclanthology.org/2021.acl-long.566)
Supplement: OptionalSupplementaryMaterial [file MT_evaluation_annotations.xlsx]

## Sheet: Annotations
This dataset contains annotations of machine translation evaluations conducted in *ACL publications. If you find annotation errors, please contact us (bmarie(at)nict.go.jp) and we will correct them.
Version: 1.00-20210601
ID	Conference	year	Title	Which automatic metrics have been used to evaluate machine translation quality?	Is there any statistical significance testing performed on the automatic metric scores?	As a human evaluation of the translation quality been conducted?	Does the paper copy and compare metric scores from previous work?	Is the paper using SacreBLEU?	If some scores have been copied from previous work, does the paper confirm that all the systems compared with previous work exploit the same exact same preprocessed training/validating/testing data?
1	ACL	2010	Pseudo-Word for Phrase-Based Machine Translation	BLEU, NIST, METEOR	yes	no	no	no	n/a
2	ACL	2010	Fine-Grained Tree-to-String Translation Rule Extraction	BLEU	yes	no	no	no	n/a
3	ACL	2010	Syntax-to-Morphology Mapping in Factored Phrase-Based Statistical Machine Translation from English to Turkish	BLEU	no	no	no	no	n/a
4	ACL	2010	Hindi-to-Urdu Machine Translation through Transliteration	BLEU	yes	no	no	no	n/a
5	ACL	2010	Training Phrase Translation Models with Leaving-One-Out	BLEU, TER	no	no	no	no	n/a
6	ACL	2010	TrustRank: Inducing Trust in Automatic Translations via Ranking	BLEU	yes	no	no	no	n/a
7	ACL	2010	Boosting-Based System Combination for Machine Translation	BLEU	yes	no	no	no	n/a
8	ACL	2010	Improving Statistical Machine Translation with Monolingual Collocation	BLEU	yes	no	no	no	n/a
9	ACL	2010	Bilingual Sense Similarity for Statistical Machine Translation	BLEU	yes	no	no	no	n/a
10	ACL	2010	Bucking the Trend: Large-Scale Cost-Focused Active Learning for Statistical Machine Translation	BLEU	no	no	no	no	n/a
11	ACL	2010	Constituency to Dependency Translation with Forests	BLEU	yes	no	no	no	n/a
12	ACL	2010	Discriminative Modeling of Extraction Sets for Machine Translation	BLEU	no	no	no	no	n/a
13	ACL	2010	Paraphrase Lattice for Statistical Machine Translation	BLEU	no	no	no	no	n/a
14	ACL	2010	A Joint Rule Selection Model for Hierarchical Phrase-Based Translation	BLEU	yes	no	no	no	n/a
15	ACL	2010	Filtering Syntactic Constraints for Statistical Machine Translation	BLEU	no	no	no	no	n/a
16	ACL	2010	Diversify and Combine: Improving Word Alignment for Machine Translation on Low-Resource Languages	BLEU	yes	no	no	no	n/a
17	ACL	2010	Efficient Path Counting Transducers for Minimum Bayes-Risk Decoding of Statistical Machine Translation Lattices	BLEU	no	no	no	no	n/a
18	ACL	2010	Tackling Sparse Data Issue in Machine Translation Evaluation	BLEU	yes	no	no	no	n/a
19	ACL	2010	Fixed Length Word Suffix for Factored Statistical Machine Translation	BLEU	no	no	no	no	n/a
20	ACL	2010	Balancing User Effort and Translation Error in Interactive Machine Translation via Confidence Measures	BLEU	no	no	no	no	n/a
21	ACL	2010	Improving Arabic-to-English Statistical Machine Translation by Reordering Post-Verbal Subjects for Alignment	BLEU, TER	yes	no	no	no	n/a
22	EMNLP	2010	Improving Translation via Targeted Paraphrasing	BLEU	no	no	no	no	n/a
23	EMNLP	2010	Soft Syntactic Constraints for Hierarchical Phrase-Based Translation Using Latent Syntactic Distributions	BLEU	yes	no	no	no	n/a
24	EMNLP	2010	A Hybrid Morpheme-Word Representation for Machine Translation of Morphologically Rich Languages	BLEU	yes	yes	no	no	n/a
25	EMNLP	2010	“Poetic” Statistical Machine Translation: Rhyme and Meter	BLEU	no	no	no	no	n/a
26	EMNLP	2010	Efficient Incremental Decoding for Tree-to-String Translation	BLEU	no	no	no	no	n/a
27	EMNLP	2010	Facilitating Translation Using Source Language Paraphrase Lattices	BLEU, TER	yes	no	no	no	n/a
28	EMNLP	2010	Non-Isomorphic Forest Pair Translation	BLEU	yes	no	no	no	n/a
29	EMNLP	2010	Discriminative Instance Weighting for Domain Adaptation in Statistical Machine Translation	BLEU	no	no	no	no	n/a
30	EMNLP	2010	Hierarchical Phrase-Based Translation Grammars Extracted from Alignment Posterior Probabilities	BLEU	no	no	no	no	n/a
31	EMNLP	2010	Maximum Entropy Based Phrase Reordering for Hierarchical Phrase-Based Translation	BLEU	yes	no	no	no	n/a
32	EMNLP	2010	Minimum Error Rate Training by Sampling the Translation Lattice	BLEU	yes	no	no	no	n/a
33	EMNLP	2010	Statistical Machine Translation with a Factorized Grammar	BLEU, METEOR	yes	no	no	no	n/a
34	EMNLP	2010	Discriminative Sample Selection for Statistical Machine Translation	BLEU	no	no	no	no	n/a
35	EMNLP	2010	Effects of Empty Categories on Machine Translation	BLEU	yes	no	no	no	n/a
36	EMNLP	2010	Example-Based Paraphrasing for Improved Phrase-Based Statistical Machine Translation	BLEU, NIST, TER, METEOR	no	no	no	no	n/a
37	EMNLP	2010	Assessing Phrase-Based Translation Models with Oracle Decoding	BLEU	no	no	no	no	n/a
38	EMNLP	2010	Combining Unsupervised and Supervised Alignments for MT: An Empirical Study	BLEU, TER	no	no	no	no	n/a
39	NAACL	2010	Learning Translation Boundaries for Phrase-Based Decoding	BLEU	yes	no	no	no	n/a
40	NAACL	2010	Task-based Evaluation of Multiword Expressions: a Pilot Study in Statistical Machine Translation	BLEU, TER	no	no	no	no	n/a
41	NAACL	2010	Improving Phrase-Based Translation with Prototypes of Short Phrases	BLEU	no	no	no	no	n/a
42	NAACL	2010	Generalizing Hierarchical Phrase-based Translation using Rules with Adjacent Nonterminals	BLEU	yes	no	no	no	n/a
43	NAACL	2010	Stream-based Translation Models for Statistical Machine Translation	BLEU	no	no	no	no	n/a
44	NAACL	2010	Statistical Machine Translation of Texts with Misspelled Words	BLEU	no	no	no	no	n/a
45	NAACL	2010	Online Learning for Interactive Statistical Machine Translation	BLEU	yes	no	no	no	n/a
46	NAACL	2010	A Direct Syntax-Driven Reordering Model for Phrase-Based Machine Translation	BLEU	no	no	no	no	n/a
47	NAACL	2010	Context-free reordering, finite-state translation	BLEU	no	no	no	no	n/a
48	NAACL	2010	Improved Models of Distortion Cost for Statistical Machine Translation	BLEU	yes	no	no	no	n/a
49	NAACL	2010	Accurate Non-Hierarchical Phrase-Based Translation	BLEU, TER	yes	no	no	no	n/a
50	NAACL	2010	Model Combination for Machine Translation	BLEU	no	no	no	no	n/a
51	NAACL	2010	The Best Lexical Metric for Phrase-Based Statistical MT System Optimization	BLEU, NIST, TER, METEOR, TERp, WER	yes	yes	no	no	n/a
52	CoNLL	2010	Learning Probabilistic Synchronous CFGs for Phrase-Based Translation	BLEU	no	no	no	no	n/a
53	CoNLL	2010	A Semi-Supervised Batch-Mode Active Learning Strategy for Improved Statistical Machine Translation	BLEU	no	no	no	no	n/a
54	ACL	2011	A Word-Class Approach to Labeling PSCFG Rules for Machine Translation	BLEU	no	no	no	no	n/a
55	ACL	2011	Effective Use of Function Words for Rule Generalization in Forest-Based Translation	BLEU	yes	no	no	no	n/a
56	ACL	2011	Combining Morpheme-based Machine Translation with Post-processing Morpheme Prediction	BLEU, WER, TER	yes	yes	yes	no	no
57	ACL	2011	A Large Scale Distributed Syntactic, Semantic and Lexical Language Model for Machine Translation	BLEU	no	yes	no	no	n/a
58	ACL	2011	Goodness: A Method for Measuring Machine Translation Confidence	BLEU, TER	no	no	no	no	n/a
59	ACL	2011	An exponential translation model for target language morphology	BLEU	no	no	no	no	n/a
60	ACL	2011	Incremental Syntactic Language Models for Phrase-based Translation	BLEU	no	no	no	no	n/a
61	ACL	2011	Learning Hierarchical Translation Structure with Linguistic Annotations	BLEU, NIST	yes	no	no	no	n/a
62	ACL	2011	Binarized Forest to String Translation	BLEU	yes	no	no	no	n/a
63	ACL	2011	Learning to Transform and Select Elementary Trees for Improved Syntax-based Machine Translations	BLEU, TER	yes	no	no	no	n/a
64	ACL	2011	Rule Markov Models for Fast Tree-to-String Translation	BLEU	yes	no	no	no	n/a
65	ACL	2011	A Joint Sequence Translation Model with Integrated Reordering	BLEU	yes	no	no	no	n/a
66	ACL	2011	Consistent Translation using Discriminative Learning - A Translation Memory-inspired Approach	BLEU, TER	yes	no	no	no	n/a
67	ACL	2011	Machine Translation System Combination by Confusion Forest	BLEU	yes	no	no	no	n/a
68	ACL	2011	Hypothesis Mixture Decoding for Statistical Machine Translation	BLEU	yes	no	no	no	n/a
69	ACL	2011	Adjoining Tree-to-String Translation	BLEU	no	no	no	no	n/a
70	ACL	2011	Enhancing Language Models in Statistical Machine Translation with Backward N-grams and Mutual Information Triggers	BLEU	yes	no	no	no	n/a
71	ACL	2011	Better Hypothesis Testing for Statistical Machine Translation: Controlling for Optimizer Instability	BLEU, METEOR, TER	yes	no	no	no	n/a
72	ACL	2011	Bayesian Word Alignment for Statistical Machine Translation	BLEU	no	no	no	no	n/a
73	ACL	2011	Corpus Expansion for Statistical Machine Translation with Semantic Role Label Substitution Rules	BLEU, TER	no	no	no	no	n/a
74	ACL	2011	Domain Adaptation for Machine Translation by Mining Unseen Words	BLEU, METEOR	no	no	no	no	n/a
75	ACL	2011	Improving Decoding Generalization for Tree-to-String Translation	BLEU	yes	no	no	no	n/a
76	ACL	2011	Discriminative Feature-Tied Mixture Modeling for Statistical Machine Translation	BLEU	yes	no	no	no	n/a
77	ACL	2011	On-line Language Model Biasing for Statistical Machine Translation	BLEU, TER	no	no	no	no	n/a
78	EMNLP	2011	Training a Parser for Machine Translation Reordering	BLEU	yes	yes	no	no	n/a
79	EMNLP	2011	Augmenting String-to-Tree Translation Models with Fuzzy Use of Source-side Syntax	BLEU	yes	no	no	no	n/a
80	EMNLP	2011	A novel dependency-to-string model for statistical machine translation	BLEU	yes	no	no	no	n/a
81	EMNLP	2011	Language Models for Machine Translation: Original vs. Translated Texts	BLEU	yes	no	no	no	n/a
82	EMNLP	2011	Better Evaluation Metrics Lead to Better Machine Translation	BLEU, TER, TESLA	yes	yes	no	no	n/a
83	EMNLP	2011	Quasi-Synchronous Phrase Dependency Grammars for Machine Translation	BLEU	no	no	no	no	n/a
84	EMNLP	2011	A Word Reordering Model for Improved Machine Translation	BLEU	no	no	no	no	n/a
85	EMNLP	2011	Feature-Rich Language-Independent Syntax-Based Alignment for Statistical Machine Translation	BLEU	yes	no	no	no	n/a
86	EMNLP	2011	Efficient retrieval of tree translation examples for Syntax-Based Machine Translation	BLEU	no	no	no	no	n/a
87	EMNLP	2011	Soft Dependency Constraints for Reordering in Hierarchical Phrase-Based Translation	BLEU, TER	yes	no	no	no	n/a
88	EMNLP	2011	Statistical Machine Translation with Local Language Models	BLEU, TER	yes	no	no	no	n/a
89	EMNLP	2011	Fast Generation of Translation Forest for Large-Scale SMT Discriminative Training	BLEU	yes	no	no	no	n/a
90	EMNLP	2011	Cache-based Document-level Statistical Machine Translation	BLEU, NIST	yes	yes	no	no	n/a
91	EMNLP	2011	Minimum Imputed-Risk: Unsupervised Discriminative Training for Machine Translation	BLEU	yes	no	no	no	n/a
92	EMNLP	2011	Watermarking the Outputs of Structured Prediction with an application in Statistical Machine Translation.	BLEU	no	no	no	no	n/a
93	EMNLP	2011	Hierarchical Phrase-based Translation Representations	BLEU	yes	no	no	no	n/a
94	ACL	2012	Prediction of Learning Curves in Machine Translation	BLEU	no	no	no	no	n/a
95	ACL	2012	A Class-Based Agreement Model for Generating Accurately Inflected Translations	BLEU	yes	yes	no	no	n/a
96	ACL	2012	Machine Translation without Words through Substring Alignment	BLEU, character-BLEU, METEOR	yes	yes	no	no	n/a
97	ACL	2012	Maximum Expected BLEU Training of Phrase and Lexicon Translation Models	BLEU	yes	no	no	no	n/a
98	ACL	2012	Learning Translation Consensus with Structured Label Propagation	BLEU	yes	no	no	no	n/a
99	ACL	2012	Smaller Alignment Models for Better Translations: Unsupervised Word Alignment with the l0-norm	BLEU	yes	no	no	no	n/a
100	ACL	2012	Translation Model Adaptation for Statistical Machine Translation with Monolingual Topic Information	BLEU	yes	no	no	no	n/a
101	ACL	2012	Modified Distortion Matrices for Phrase-Based Statistical Machine Translation	BLEU, METEOR, KRS	yes	no	no	no	n/a
102	ACL	2012	A Topic Similarity Model for Hierarchical Phrase-based Translation	BLEU	yes	no	no	no	n/a
103	ACL	2012	Modeling the Translation of Predicate-Argument Structure for SMT	BLEU	yes	no	no	no	n/a
104	ACL	2012	A Ranking-based Approach to Word Reordering for Statistical Machine Translation	BLEU	yes	no	no	no	n/a
105	ACL	2012	Mixing Multiple Translation Models in Statistical Machine Translation	BLEU	yes	no	no	no	n/a
106	ACL	2012	Hierarchical Chunk-to-String Translation	BLEU	yes	no	no	no	n/a
107	ACL	2012	Fast and Scalable Decoding with Language Model Look-Ahead for Phrase-based Statistical Machine Translation	BLEU, TER	no	no	no	no	n/a
108	ACL	2012	Head-Driven Hierarchical Phrase-based Translation	BLEU	yes	no	no	no	n/a
109	ACL	2012	A Comparative Study of Target Dependency Structures for Statistical Machine Translation	BLEU	yes	no	no	no	n/a
110	ACL	2012	Topic Models for Dynamic Translation Model Adaptation	BLEU, TER	yes	no	no	no	n/a
111	ACL	2012	Learning Better Rule Extraction with Translation Span Alignment	BLEU	yes	no	no	no	n/a
112	ACL	2012	Enhancing Statistical Machine Translation with Character Alignment	BLEU-SBP	yes	no	no	no	n/a
113	ACL	2012	Translation Model Size Reduction for Hierarchical Phrase-based Statistical Machine Translation	BLEU	no	no	no	no	n/a
114	ACL	2012	Combining Word-Level and Character-Level Models for Machine Translation Between Closely-Related Languages	BLEU, NIST, TER, METEOR	yes	no	no	no	n/a
115	ACL	2012	Post-ordering by Parsing for Japanese-English Statistical Machine Translation	BLEU, RIBES	no	no	no	no	n/a
116	ACL	2012	An Exploration of Forest-to-String Translation: Does Translation Help or Hurt Parsing?	BLEU	no	no	no	no	n/a
117	ACL	2012	Joint Feature Selection in Distributed Stochastic Learning for Large-Scale Discriminative Training in SMT	BLEU	yes	no	no	no	n/a
118	ACL	2012	PORT: a Precision-Order-Recall MT Evaluation Metric for Tuning	BLEU, METEOR, TER, PORT	yes	yes	no	no	n/a
119	ACL	2012	Improve SMT Quality with Automatically Extracted Paraphrase Rules	BLEU, TER	no	no	no	no	n/a
120	ACL	2012	Unsupervised Morphology Rivals Supervised Morphology for Arabic MT	BLEU	yes	no	no	no	n/a
121	EACL	2012	Computing Lattice BLEU Oracle Scores for Machine Translation	BLEU	no	no	no	no	n/a
122	EACL	2012	Toward Statistical Machine Translation without Parallel Corpora	BLEU	no	no	no	no	n/a
123	EACL	2012	Character-Based Pivot Translation for Under-Resourced Languages and Domains	BLEU, LCSR	yes	no	no	no	n/a
124	EACL	2012	Does more data always yield better translations?	BLEU, TER	no	no	no	no	n/a
125	EACL	2012	Active learning for interactive machine translation	BLEU	no	no	no	no	n/a
126	EACL	2012	Adapting Translation Models to Translationese Improves SMT	BLEU	yes	yes	no	no	n/a
127	EACL	2012	Cutting the Long Tail: Hybrid Language Models for Translation Style Adaptation	BLEU, METEOR, TER	yes	no	no	no	n/a
128	EACL	2012	Perplexity Minimization for Translation Model Domain Adaptation in Statistical Machine Translation	BLEU, METEOR	yes	no	no	no	n/a
129	EACL	2012	Structural and Topical Dimensions in Multi-Task Patent Translation	BLEU	yes	no	no	no	n/a
130	EACL	2012	Modeling Inflection and Word-Formation in SMT	BLEU	yes	no	no	no	n/a
131	EACL	2012	Determining the placement of German verbs in English–to–German SMT	BLEU	yes	yes	no	no	n/a
132	EMNLP	2012	Large Scale Decipherment for Out-of-Domain Machine Translation	BLEU	no	no	no	no	n/a
133	EMNLP	2012	N-gram-based Tense Models for Statistical Machine Translation	BLEU, NIST	yes	yes	no	no	n/a
134	EMNLP	2012	Source Language Adaptation for Resource-Poor Machine Translation	BLEU, TER, METEOR	yes	yes	no	no	n/a
135	EMNLP	2012	Forced Derivation Tree based Model Training to Statistical Machine Translation	BLEU	no	no	no	no	n/a
136	EMNLP	2012	Translation Model Based Cross-Lingual Language Model Adaptation: from Word Models to Phrase Models	BLEU	yes	no	no	no	n/a
137	EMNLP	2012	Inducing a Discriminative Parser to Optimize Machine Translation Reordering	BLEU, RIBES	yes	no	no	no	n/a
138	EMNLP	2012	Entropy-based Pruning for Phrase-based Machine Translation	BLEU	no	no	no	no	n/a
139	EMNLP	2012	Document-Wide Decoding for Phrase-Based Statistical Machine Translation	BLEU, NIST	no	no	no	no	n/a
140	EMNLP	2012	Locally Training the Log-Linear Model for SMT	BLEU	yes	no	no	no	n/a
141	EMNLP	2012	Re-training Monolingual Parser Bilingually for Syntactic SMT	BLEU	yes	no	no	no	n/a
142	NAACL	2012	Continuous Space Translation Models with Neural Networks	BLEU	no	no	no	no	n/a
143	NAACL	2012	Machine Translation of Arabic Dialects	BLEU	no	no	no	no	n/a
144	NAACL	2012	Structured Ramp Loss Minimization for Machine Translation	BLEU	no	no	no	no	n/a
145	NAACL	2012	Optimized Online Rank Learning for Machine Translation	BLEU	yes	no	no	no	n/a
146	NAACL	2012	Insertion and Deletion Models for Statistical Machine Translation	BLEU, TER	yes	no	no	no	n/a
147	NAACL	2012	Encouraging Consistent Translation Choices	BLEU	no	no	no	no	n/a
148	NAACL	2012	Batch Tuning Strategies for Statistical Machine Translation	BLEU	no	no	no	no	n/a
149	NAACL	2012	Real-time Incremental Speech-to-Speech Translation of Dialogs	BLEU, TER	yes	no	no	no	n/a
150	NAACL	2012	Trait-Based Hypothesis Selection For Machine Translation	BLEU	yes	no	no	no	n/a
151	NAACL	2012	Improved Reordering for Shallow-n Grammar based Hierarchical Phrase-based Translation	BLEU	no	no	no	no	n/a
152	NAACL	2012	Why Not Grab a Free Lunch? Mining Large Corpora for Parallel Sentences to Improve Translation Modeling	BLEU	no	no	no	no	n/a
153	ACL	2013	A Shift-Reduce Parsing Algorithm for Phrase-based String-to-Dependency Translation	BLEU, TER	yes	no	no	no	n/a
154	ACL	2013	Integrating Translation Memory into Phrase-Based Machine Translation during Decoding	BLEU, TER	yes	no	no	no	n/a
155	ACL	2013	Distortion Model Considering Rich Context for Statistical Machine Translation	BLEU	yes	no	no	no	n/a
156	ACL	2013	Fast and Adaptive Online Training of Feature-Rich Translation Models	BLEU	yes	no	yes	no	no
157	ACL	2013	Advancements in Reordering Models for Statistical Machine Translation	BLEU, TER	yes	no	no	no	n/a
158	ACL	2013	A Markov Model of Machine Translation using Non-parametric Bayesian Inference	BLEU	no	no	no	no	n/a
159	ACL	2013	Scalable Decipherment for Machine Translation via Hash Sampling	BLEU	no	no	yes	no	no
160	ACL	2013	Using subcategorization knowledge to improve case prediction for translation to German	BLEU	yes	yes	no	no	n/a
161	ACL	2013	Name-aware Machine Translation	BLEU, TER	yes	yes	no	no	n/a
162	ACL	2013	An Infinite Hierarchical Bayesian Model of Phrasal Translation	BLEU	yes	no	no	no	n/a
163	ACL	2013	Additive Neural Networks for Statistical Machine Translation	BLEU	yes	no	no	no	n/a
164	ACL	2013	Hierarchical Phrase Table Combination for Machine Translation	BLEU	no	no	no	no	n/a
165	ACL	2013	Shallow Local Multi-Bottom-up Tree Transducers in Statistical Machine Translation	BLEU	yes	no	no	no	n/a
166	ACL	2013	Enlisting the Ghost: Modeling Empty Categories for Machine Translation	BLEU	yes	no	no	no	n/a
167	ACL	2013	A Multi-Domain Translation Model Framework for Statistical Machine Translation	BLEU	yes	no	no	no	n/a
168	ACL	2013	Part-of-Speech Induction in Dependency Trees for Statistical Machine Translation	BLEU	yes	no	no	no	n/a
169	ACL	2013	Graph Propagation for Paraphrasing Out-of-Vocabulary Words in Statistical Machine Translation	BLEU	yes	no	no	no	n/a
170	ACL	2013	Online Relative Margin Maximization for Statistical Machine Translation	BLEU, TER	no	no	no	no	n/a
171	ACL	2013	Handling Ambiguities of Bilingual Predicate-Argument Structures for Statistical Machine Translation	BLEU	yes	no	no	no	n/a
172	ACL	2013	Cut the noise: Mutually reinforcing reordering and alignments for improved machine translation	BLEU	no	no	no	no	n/a
173	ACL	2013	Vector Space Model for Adaptation in Statistical Machine Translation	BLEU	yes	no	no	no	n/a
174	ACL	2013	Learning a Phrase-based Translation Model from Monolingual Data with Application to Domain Adaptation	BLEU	yes	no	no	no	n/a
175	ACL	2013	Integrating Phrase-based Reordering Features into a Chart-based Decoder for Machine Translation	BLEU	no	no	no	no	n/a
176	ACL	2013	Using Context Vectors in Improving a Machine Translation System with Bridge Language	BLEU	yes	no	no	no	n/a
177	ACL	2013	Task Alternation in Parallel Sentence Retrieval for Twitter Translation	BLEU	yes	no	no	no	n/a
178	ACL	2013	Stacking for Statistical Machine Translation	BLEU	no	no	no	no	n/a
179	ACL	2013	Stem Translation with Affix-Based Rule Selection for Agglutinative Languages	BLEU	yes	no	no	no	n/a
180	ACL	2013	A Novel Translation Framework Based on Rhetorical Structure Theory	BLEU	no	no	no	no	n/a
181	ACL	2013	Improving machine translation by training against an automatic semantic frame based evaluation metric	BLEU, NIST, METEOR, WER, CDER, MEANT, TER	yes	yes	no	no	n/a
182	ACL	2013	Bilingual Lexical Cohesion Trigger Model for Document-Level Machine Translation	BLEU	no	no	no	no	n/a
183	ACL	2013	Can Markov Models Over Minimal Translation Units Help Phrase-Based SMT?	BLEU	yes	no	no	no	n/a
184	ACL	2013	Learning Non-linear Features for Machine Translation Using Gradient Boosting Machines	BLEU-SBP	no	no	no	no	n/a
185	ACL	2013	Language Independent Connectivity Strength Features for Phrase Pivot Statistical Machine Translation	BLEU, METEOR	yes	no	no	no	n/a
186	ACL	2013	Semantic Roles for String to Tree Machine Translation	BLEU	yes	no	no	no	n/a
187	ACL	2013	Adaptation Data Selection using Neural Language Models: Experiments in Machine Translation	BLEU, RIBES, TER	yes	no	no	no	n/a
188	ACL	2013	Incremental Topic-Based Translation Model Adaptation for Conversational Spoken Language Translation	BLEU, TER, NIST	yes	no	no	no	n/a
189	ACL	2013	Bilingual Data Cleaning for SMT using Graph-based Random Walk	BLEU	yes	no	no	no	n/a
190	ACL	2013	Learning to Prune: Context-Sensitive Pruning for Syntactic MT	BLEU	no	no	no	no	n/a
191	ACL	2013	Generalized Reordering Rules for Improved SMT	BLEU	no	yes	no	no	n/a
192	EMNLP	2013	Max-Margin Synchronous Grammar Induction for Machine Translation	BLEU	yes	no	no	no	n/a
193	EMNLP	2013	Anchor Graph: Global Reordering Contexts for Statistical Machine Translation	BLEU, TER	no	no	no	no	n/a
194	EMNLP	2013	Source-Side Classifier Preordering for Machine Translation	BLEU	yes	yes	no	no	n/a
195	EMNLP	2013	Improving Pivot-Based Statistical Machine Translation Using Random Walk	BLEU	yes	no	no	no	n/a
196	EMNLP	2013	Factored Soft Source Syntactic Constraints for Hierarchical Machine Translation	BLEU	yes	no	no	no	n/a
197	EMNLP	2013	Recursive Autoencoders for ITG-Based Translation	BLEU	yes	no	no	no	n/a
198	EMNLP	2013	What is Hidden among Translation Rules	BLEU, TER	no	no	no	no	n/a
199	EMNLP	2013	Converting Continuous-Space Language Models into N-Gram Language Models for Statistical Machine Translation	BLEU	yes	no	no	no	n/a
200	EMNLP	2013	A Corpus Level MIRA Tuning Strategy for Machine Translation	BLEU	yes	no	no	no	n/a
201	EMNLP	2013	Joint Language and Translation Modeling with Recurrent Neural Networks	BLEU	yes	no	no	no	n/a
202	EMNLP	2013	Translation with Source Constituency and Dependency Trees	BLEU	yes	no	no	no	n/a
203	EMNLP	2013	Monolingual Marginal Matching for Translation Model Adaptation	BLEU	no	no	no	no	n/a
204	EMNLP	2013	Efficient Left-to-Right Hierarchical Phrase-Based Translation with Improved Reordering	BLEU	no	no	no	no	n/a
205	EMNLP	2013	A Systematic Exploration of Diversity in Machine Translation	BLEU	no	yes	no	no	n/a
206	EMNLP	2013	Improving Statistical Machine Translation with Word Class Models	BLEU, TER	yes	no	no	no	n/a
207	EMNLP	2013	Shift-Reduce Word Reordering for Machine Translation	BLEU, RIBES	no	no	yes	no	no
208	EMNLP	2013	Decoding with Large-Scale Neural Language Models Improves Translation	BLEU	no	no	no	no	n/a
209	EMNLP	2013	Bilingual Word Embeddings for Phrase-Based Machine Translation	BLEU	yes	no	no	no	n/a
210	EMNLP	2013	Lexical Chain Based Cohesion Models for Document-Level Statistical Machine Translation	BLEU	no	no	no	no	n/a
211	EMNLP	2013	Dependency-Based Decipherment for Resource-Limited Machine Translation	BLEU	no	no	no	no	n/a
212	EMNLP	2013	Recurrent Continuous Translation Models	BLEU	no	no	no	no	n/a
213	EMNLP	2013	Multi-Domain Adaptation for SMT Using Multi-Task Learning	BLEU	yes	no	yes	no	no
214	EMNLP	2013	Max-Violation Perceptron and Forced Decoding for Scalable MT Training	BLEU	yes	no	no	no	n/a
215	NAACL	2013	Model With Minimal Translation Units, But Decode With Phrases	BLEU	yes	no	no	no	n/a
216	NAACL	2013	Supersense Tagging for Arabic: the MT-in-the-Middle Attack	BLEU, METEOR, TER	no	no	no	no	n/a
217	NAACL	2013	Improved Reordering for Phrase-Based Translation using Sparse Features	BLEU	yes	no	no	no	n/a
218	NAACL	2013	Simultaneous Word-Morpheme Alignment for Statistical Machine Translation	BLEU	yes	no	no	no	n/a
219	NAACL	2013	Segmentation Strategies for Streaming Speech Translation	BLEU	no	no	no	no	n/a
220	NAACL	2013	Large-Scale Discriminative Training for Statistical Machine Translation Using Held-Out Line Search	BLEU	yes	no	no	no	n/a
221	NAACL	2013	Improving Syntax-Augmented Machine Translation by Coarsening the Label Set	BLEU, METEOR, TER	yes	no	no	no	n/a
222	NAACL	2013	Discriminative Training of 150 Million Translation Parameters and Its Application to Pruning	BLEU	no	no	no	no	n/a
223	NAACL	2013	Applying Pairwise Ranked Optimisation to Improve the Interpolation of Translation Models	BLEU	no	no	no	no	n/a
224	NAACL	2013	Dialectal Arabic to English Machine Translation: Pivoting through Modern Standard Arabic	BLEU	yes	yes	no	no	n/a
225	NAACL	2013	Using a Supertagged Dependency Language Model to Select a Good Translation in System Combination	BLEU, METEOR, TER	no	no	no	no	n/a
226	NAACL	2013	Training MRF-Based Phrase Translation Models using Gradient Ascent	BLEU	yes	no	no	no	n/a
227	NAACL	2013	A Beam-Search Decoder for Normalization of Social Media Text with Application to Machine Translation	BLEU	yes	no	no	no	n/a
228	NAACL	2013	Modeling Syntactic and Semantic Structures in Hierarchical Phrase-based Translation	BLEU	yes	no	no	no	n/a
229	NAACL	2013	Systematic Comparison of Professional and Crowdsourced Reference Translations for Machine Translation	BLEU	no	no	no	no	n/a
230	NAACL	2013	Phrase Training Based Adaptation for Statistical Machine Translation	BLEU, TER	no	no	no	no	n/a
231	NAACL	2013	Adaptation of Reordering Models for Statistical Machine Translation	BLEU	yes	no	no	no	n/a
232	NAACL	2013	Beyond Left-to-Right: Multiple Decomposition Structures for SMT	BLEU	yes	no	no	no	n/a
233	ACL	2014	Lattice Desegmentation for Statistical Machine Translation	BLEU, TER	yes	yes	no	no	n/a
234	ACL	2014	Bilingually-constrained Phrase Embeddings for Machine Translation	BLEU	yes	no	no	no	n/a
235	ACL	2014	Learning New Semi-Supervised Deep Auto-encoder Features for Statistical Machine Translation	BLEU	yes	no	no	no	n/a
236	ACL	2014	Graph-based Semi-Supervised Learning of Translation Models from Monolingual Data	BLEU	no	no	no	no	n/a
237	ACL	2014	Learning Continuous Phrase Representations for Translation Modeling	BLEU	yes	no	no	no	n/a
238	ACL	2014	Translation Assistance by Translation of L1 Fragments in an L2 Context	BLEU, METEOR, WER, NIST, PER	yes	no	no	no	n/a
239	ACL	2014	Response-based Learning for Grounded Machine Translation	BLEU	yes	no	no	no	n/a
240	ACL	2014	A Unified Model for Soft Linguistic Reordering Constraints in Statistical Machine Translation	BLEU	yes	no	no	no	n/a
241	ACL	2014	Polylingual Tree-Based Topic Models for Translation Domain Adaptation	BLEU, TER	yes	no	no	no	n/a
242	ACL	2014	Fast and Robust Neural Network Joint Models for Statistical Machine Translation	BLEU	no	no	yes	no	no
243	ACL	2014	A Sense-Based Translation Model for Statistical Machine Translation	BLEU, NIST	no	no	no	no	n/a
244	ACL	2014	A Recursive Recurrent Neural Network for Statistical Machine Translation	BLEU	yes	no	no	no	n/a
245	ACL	2014	On the Elements of an Accurate Tree-to-String Machine Translation System	BLEU, RIBES	yes	no	no	no	n/a
246	ACL	2014	Dependency-based Pre-ordering for Chinese-English Machine Translation	BLEU	yes	no	no	no	n/a
247	ACL	2014	Optimizing Segmentation Strategies for Simultaneous Speech Translation	BLEU, RIBES	no	no	no	no	n/a
248	ACL	2014	A joint inference of deep case analysis and zero subject generation for Japanese-to-English statistical machine translation	BLEU, RIBES	no	no	no	no	n/a
249	ACL	2014	A Hybrid Approach to Skeleton-based Translation	BLEU, TER	yes	no	no	no	n/a
250	ACL	2014	Effective Selection of Translation Model Training Data	BLEU	no	no	no	no	n/a
251	ACL	2014	Sentence Level Dialect Identification for Machine Translation System Selection	BLEU	yes	no	no	no	n/a
252	ACL	2014	Learning Topic Representation for SMT with Neural Networks	BLEU	yes	no	no	no	n/a
253	ACL	2014	Enhancing Grammatical Cohesion: Generating Transitional Expressions for SMT	BLEU	yes	no	no	no	n/a
254	ACL	2014	Toward Better Chinese Word Segmentation for SMT via Bilingual Constraints	BLEU, NIST, METEOR	no	no	no	no	n/a
255	ACL	2014	Empirical Study of Unsupervised Chinese Word Segmentation Methods for SMT on Large-scale Corpora	BLEU	no	no	no	no	n/a
256	ACL	2014	RNN-based Derivation Structure Prediction for SMT	BLEU	yes	no	no	no	n/a
257	ACL	2014	Hierarchical MT Training using Max-Violation Perceptron	BLEU	no	no	no	no	n/a
258	EACL	2014	Undirected Machine Translation with Discriminative Reinforcement Learning	BLEU	yes	no	no	no	n/a
259	EACL	2014	Minimum Translation Modeling with Recurrent Neural Networks	BLEU	no	no	no	no	n/a
260	EACL	2014	Source-side Preordering for Translation using Logistic Regression and Depth-first Branch-and-Bound Search	BLEU	no	no	no	no	n/a
261	EACL	2014	Learning from Post-Editing: Online Model Adaptation for Statistical Machine Translation	BLEU	yes	no	no	no	n/a
262	EACL	2014	Dependency Tree Abstraction for Long-Distance Reordering in Statistical Machine Translation	BLEU	yes	yes	no	no	n/a
263	EACL	2014	Is Machine Translation Getting Better over Time?	BLEU, METEOR	yes	yes	no	no	n/a
264	EACL	2014	Bilingual Sentiment Consistency for Statistical Machine Translation	BLEU	yes	yes	no	no	n/a
265	EACL	2014	Augmenting Translation Models with Simulated Acoustic Confusions for Improved Spoken Language Translation	BLEU	yes	yes	no	no	n/a
266	EACL	2014	Inference of Phrase-Based Translation Models via Minimum Description Length	BLEU	no	no	no	no	n/a
267	EACL	2014	Integrating an Unsupervised Transliteration Model into Statistical Machine Translation	BLEU	no	no	no	no	n/a
268	EACL	2014	Simple and Effective Approach for Consistent Training of Hierarchical Phrase-based Translation Models	BLEU, TER	yes	no	no	no	n/a
269	EACL	2014	Structured and Unstructured Cache Models for SMT Domain Adaptation	BLEU	yes	no	no	no	n/a
270	EACL	2014	Dynamic Topic Adaptation for Phrase-based MT	BLEU	yes	no	no	no	n/a
271	EACL	2014	How to Produce Unseen Teddy Bears: Improved Morphological Processing of Compounds in SMT	BLEU	yes	yes	no	no	n/a
272	EACL	2014	Applying the semantics of negation to SMT through n-best list re-ranking	BLEU, RTE	no	no	no	no	n/a
273	EMNLP	2014	Translation Modeling with Bidirectional Recurrent Neural Networks	BLEU, TER	no	no	no	no	n/a
274	EMNLP	2014	Submodularity for Data Selection in Machine Translation	BLEU	yes	no	no	no	n/a
275	EMNLP	2014	Improve Statistical Machine Translation with Context-Sensitive Bilingual Semantic Embedding Model	BLEU	yes	no	no	no	n/a
276	EMNLP	2014	Transformation from Discontinuous to Continuous Word Alignment Improves Translation Quality	BLEU	yes	no	no	no	n/a
277	EMNLP	2014	Syntax-Augmented Machine Translation using Syntax-Label Clustering	BLEU	yes	no	no	no	n/a
278	EMNLP	2014	Learning Hierarchical Translation Spans	BLEU, TER	yes	no	no	no	n/a
279	EMNLP	2014	Neural Network Based Bilingual Language Model Growing for Statistical Machine Translation	BLEU	yes	no	no	no	n/a
280	EMNLP	2014	Better Statistical Machine Translation through Linguistic Treatment of Phrasal Verbs	BLEU, NIST	no	yes	no	no	n/a
281	EMNLP	2014	Two Improvements to Left-to-Right Decoding for Hierarchical Phrase-based Machine Translation	BLEU	yes	no	no	no	n/a
282	EMNLP	2014	Reordering Model for Forest-to-String Machine Translation	BLEU, TER	no	no	no	no	n/a
283	EMNLP	2014	Modeling Term Translation for Document-informed Machine Translation	BLEU	yes	no	no	no	n/a
284	EMNLP	2014	Beyond Parallel Data: Joint Word Alignment and Decipherment Improves Machine Translation	BLEU	no	no	no	no	n/a
285	EMNLP	2014	Translation Rules with Right-Hand Side Lattices	BLEU	no	no	no	no	n/a
286	EMNLP	2014	Exact Decoding for Phrase-Based Statistical Machine Translation	BLEU	no	no	no	no	n/a
287	EMNLP	2014	Confidence-based Rewriting of Machine Translation Output	BLEU, TER	no	no	no	no	n/a
288	EMNLP	2014	Don’t Until the Final Verb Wait: Reinforcement Learning for Simultaneous Machine Translation	LBLEU	no	no	no	no	n/a
289	EMNLP	2014	Refining Word Segmentation Using a Manually Aligned Corpus for Statistical Machine Translation	BLEU	no	no	no	no	n/a
290	EMNLP	2014	Improving Pivot-Based Statistical Machine Translation by Pivoting the Co-occurrence Count of Phrase Pairs	BLEU	yes	no	no	no	n/a
291	EMNLP	2014	Word Translation Prediction for Morphologically Rich Languages with Bilingual Neural Networks	BLEU	yes	no	no	no	n/a
292	EMNLP	2014	Dependency-Based Bilingual Language Models for Reordering in Statistical Machine Translation	BLEU, TER	yes	no	no	no	n/a
293	EMNLP	2014	Learning Phrase Representations using RNN Encoder–Decoder for Statistical Machine Translation	BLEU	no	no	no	no	n/a
294	EMNLP	2014	Large-scale Reordering Model for Statistical Machine Translation using Dual Multinomial Logistic Regression	BLEU	yes	no	no	no	n/a
295	EMNLP	2014	Search-Aware Tuning for Machine Translation	BLEU	no	no	no	no	n/a
296	EMNLP	2014	Latent-Variable Synchronous CFGs for Hierarchical Translation	BLEU	yes	no	no	no	n/a
297	EMNLP	2014	Syntactic SMT Using a Discriminative Text Generation Model	BLEU	no	no	no	no	n/a
298	CoNLL	2014	Factored Markov Translation with Robust Modeling	BLEU	yes	no	no	no	n/a
299	CoNLL	2014	Hallucinating Phrase Translations for Low Resource MT	BLEU	yes	no	no	no	n/a
300	ACL	2015	On Using Very Large Target Vocabulary for Neural Machine Translation	BLEU	no	no	yes	no	no
301	ACL	2015	Addressing the Rare Word Problem in Neural Machine Translation	BLEU	no	no	yes	no	no
302	ACL	2015	Encoding Source Language with Convolutional Neural Network for Machine Translation	BLEU	yes	no	no	no	n/a
303	ACL	2015	Statistical Machine Translation Features with Multitask Tensor Networks	BLEU, TER	no	no	no	no	n/a
304	ACL	2015	Syntax-based Simultaneous Translation through Prediction of Unseen Syntactic Constituents	BLEU	no	no	no	no	n/a
305	ACL	2015	Efficient Top-Down BTG Parsing for Machine Translation Preordering	BLEU	yes	no	no	no	n/a
306	ACL	2015	A Context-Aware Topic Model for Statistical Machine Translation	BLEU	yes	no	no	no	n/a
307	ACL	2015	Non-linear Learning for Statistical Machine Translation	BLEU	yes	no	no	no	n/a
308	ACL	2015	Non-projective Dependency-based Pre-Reordering with Recurrent Neural Network for Machine Translation	BLEU	yes	no	no	no	n/a
309	ACL	2015	Multi-Task Learning for Multiple Language Translation	BLEU	no	no	no	no	n/a
310	ACL	2015	Recurrent Neural Network based Rule Sequence Model for Statistical Machine Translation	BLEU	yes	no	no	no	n/a
311	ACL	2015	Context-Dependent Translation Selection Using Convolutional Neural Network	BLEU	yes	no	no	no	n/a
312	ACL	2015	Learning Word Reorderings for Hierarchical Phrase-based Statistical Machine Translation	BLEU	yes	no	no	no	n/a
313	ACL	2015	Multi-Pass Decoding With Complex Feature Guidance for Statistical Machine Translation	BLEU	no	no	no	no	n/a
314	ACL	2015	Improving Pivot Translation by Remembering the Pivot	BLEU	yes	no	no	no	n/a
315	ACL	2015	Exploring the Planet of the APEs: a Comparative Study of State-of-the-art Methods for MT Automatic Post-Editing	TER	yes	no	no	no	n/a
316	EMNLP	2015	Dependency Graph-to-String Translation	BLEU, METEOR, TER	yes	no	no	no	n/a
317	EMNLP	2015	Syntax-based Rewriting for Simultaneous Machine Translation	BLEU, RIBES	no	no	no	no	n/a
318	EMNLP	2015	Touch-Based Pre-Post-Editing of Machine Translation Output	BLEU, TER	no	no	no	no	n/a
319	EMNLP	2015	A Discriminative Training Procedure for Continuous Translation Models	BLEU	no	no	no	no	n/a
320	EMNLP	2015	System Combination for Machine Translation through Paraphrasing	BLEU	no	no	no	no	n/a
321	EMNLP	2015	Hierarchical Incremental Adaptation for Statistical Machine Translation	BLEU	yes	no	no	no	n/a
322	EMNLP	2015	Rule Selection with Soft Syntactic Features for String-to-Tree Statistical Machine Translation	BLEU	yes	no	no	no	n/a
323	EMNLP	2015	Graph-Based Collective Lexical Selection for Statistical Machine Translation	BLEU	yes	no	no	no	n/a
324	EMNLP	2015	Bilingual Correspondence Recursive Autoencoder for Statistical Machine Translation	BLEU	yes	no	no	no	n/a
325	EMNLP	2015	Improving Statistical Machine Translation with a Multilingual Paraphrase Database	BLEU	yes	no	no	no	n/a
326	EMNLP	2015	Learning Semantic Representations for Nonterminals in Hierarchical Phrase-Based Translation	BLEU	yes	no	no	no	n/a
327	EMNLP	2015	A Comparison between Count and Neural Network Models Based on Joint Translation and Reordering Sequences	BLEU	no	no	no	no	n/a
328	EMNLP	2015	Effective Approaches to Attention-based Neural Machine Translation	BLEU	no	no	yes	no	no
329	EMNLP	2015	A Coarse-Grained Model for Optimal Coupling of ASR and SMT Systems for Speech Translation	BLEU	no	no	no	no	n/a
330	EMNLP	2015	A Joint Dependency Model of Morphological and Syntactic Structure for Statistical Machine Translation	BLEU	yes	yes	yes	no	yes
331	EMNLP	2015	Variable-Length Word Encodings for Neural Translation Models	BLEU	no	no	no	no	n/a
332	EMNLP	2015	A Binarized Neural Network Joint Model for Machine Translation	BLEU	yes	no	no	no	n/a
333	EMNLP	2015	Bilingual Structured Language Models for Statistical Machine Translation	BLEU	yes	no	no	no	n/a
334	NAACL	2015	Multi-Target Machine Translation with Multi-Synchronous Context-free Grammars	BLEU	yes	no	no	no	n/a
335	NAACL	2015	Pragmatic Neural Language Modelling in Machine Translation	BLEU	no	no	no	no	n/a
336	NAACL	2015	Morphological Modeling for Machine Translation of English-Iraqi Arabic Spoken Dialogs	BLEU	yes	yes	no	no	n/a
337	NAACL	2015	Continuous Adaptation to User Feedback for Statistical Machine Translation	TER	no	yes	no	no	n/a
338	NAACL	2015	Learning Translation Models from Monolingual Continuous Representations	BLEU	no	no	no	no	n/a
339	NAACL	2015	APRO: All-Pairs Ranking Optimization for MT Tuning	BLEU	no	no	no	no	n/a
340	NAACL	2015	Fast and Accurate Preordering for SMT using Neural Networks	BLEU	no	no	yes	no	no
341	NAACL	2015	Leveraging Small Multilingual Corpora for SMT Using Many Pivot Languages	BLEU	yes	no	no	no	n/a
342	CoNLL	2015	A Coactive Learning View of Online Structured Prediction in Statistical Machine Translation	TER	no	no	no	no	n/a
343	CoNLL	2015	Analyzing Optimization for Statistical Machine Translation: MERT Learns Verbosity, PRO Learns Length	BLEU	yes	no	no	no	n/a
344	CoNLL	2015	Deep Neural Language Models for Machine Translation	BLEU, TER	yes	no	no	no	n/a
345	ACL	2016	Models and Inference for Prefix-Constrained Machine Translation	BLEU	no	yes	no	no	n/a
346	ACL	2016	Improving Neural Machine Translation Models with Monolingual Data	BLEU	no	no	yes	no	no
347	ACL	2016	Modeling Coverage for Neural Machine Translation	BLEU	yes	no	no	no	n/a
348	ACL	2016	Graph-Based Translation Via Graph Segmentation	BLEU, METEOR, TER	yes	no	no	no	n/a
349	ACL	2016	Tree-to-Sequence Attentional Neural Machine Translation	BLEU, RIBES	no	no	no	no	n/a
350	ACL	2016	Achieving Open Vocabulary Neural Machine Translation with Hybrid Word-Character Models	BLEU	no	no	yes	no	no
351	ACL	2016	Synthesizing Compound Words for Machine Translation	BLEU, METEOR, TER	no	no	no	no	n/a
352	ACL	2016	A Continuous Space Rule Selection Model for Syntax-based Statistical Machine Translation	BLEU	yes	no	no	no	n/a
353	ACL	2016	Minimum Risk Training for Neural Machine Translation	BLEU, TER, NIST	yes	yes	yes	no	no
354	ACL	2016	A Character-level Decoder without Explicit Segmentation for Neural Machine Translation	BLEU	no	no	yes	no	no
355	ACL	2016	Target-Side Context for Discriminative Models in Statistical Machine Translation	BLEU	yes	yes	no	no	n/a
356	ACL	2016	Neural Machine Translation of Rare Words with Subword Units	BLEU, chrF, unigram F1	no	no	yes	no	no
357	ACL	2016	Semi-Supervised Learning for Neural Machine Translation	BLEU	yes	no	no	no	n/a
358	ACL	2016	Knowledge-Based Semantic Embedding for Machine Translation	BLEU	yes	yes	no	no	n/a
359	ACL	2016	Multimodal Pivots for Image Caption Translation	BLEU, METEOR, TER	yes	yes	no	no	n/a
360	ACL	2016	Improving Statistical Machine Translation Performance by Oracle-BLEU Model Re-estimation	BLEU	yes	no	no	no	n/a
361	ACL	2016	Vocabulary Manipulation for Neural Machine Translation	BLEU	no	no	yes	no	no
362	ACL	2016	Exponentially Decaying Bag-of-Words Input Features for Feed-Forward Neural Network in Statistical Machine Translation	BLEU, TER	yes	no	no	no	n/a
363	ACL	2016	Syntactically Guided Neural Machine Translation	BLEU	no	no	yes	no	no
364	ACL	2016	Character-based Neural Machine Translation	BLEU	no	no	no	no	n/a
365	ACL	2016	Phrase-Level Combination of SMT and TM Using Constrained Word Lattice	BLEU, TER	yes	no	no	no	n/a
366	EMNLP	2016	Neural versus Phrase-Based Machine Translation Quality: a Case Study	BLEU, HTER, TER	yes	yes	no	no	n/a
367	EMNLP	2016	Zero-Resource Translation with Multi-Lingual Neural Machine Translation	BLEU	no	no	no	no	n/a
368	EMNLP	2016	Memory-enhanced Decoder for Neural Machine Translation	BLEU	no	no	no	no	n/a
369	EMNLP	2016	Automatic Cross-Lingual Similarization of Dependency Grammars for Tree-based Machine Translation	BLEU	no	no	yes	no	no
370	EMNLP	2016	Variational Neural Machine Translation	BLEU	yes	no	yes	no	no
371	EMNLP	2016	Coverage Embedding Models for Neural Machine Translation	BLEU, TER-BLEU	yes	no	no	no	n/a
372	EMNLP	2016	Exploiting Source-side Monolingual Data in Neural Machine Translation	BLEU	no	no	no	no	n/a
373	EMNLP	2016	Incorporating Discrete Translation Lexicons into Neural Machine Translation	BLEU, NIST	yes	no	no	no	n/a
374	EMNLP	2016	Transfer Learning for Low-Resource Neural Machine Translation	BLEU	no	no	no	no	n/a
375	EMNLP	2016	Insertion Position Selection Model for Flexible Non-Terminals in Dependency Tree-to-Tree Machine Translation	BLEU, RIBES	yes	no	no	no	n/a
376	EMNLP	2016	Supervised Attentions for Neural Machine Translation	BLEU, TER-BLEU	yes	no	no	no	n/a
377	EMNLP	2016	Measuring the behavioral impact of machine translation quality improvements with A/B testing	BLEU	yes	yes	no	no	n/a
378	EMNLP	2016	Orthographic Syllable as basic unit for SMT between Related Languages	BLEU, LeBLEU	no	no	no	no	n/a
379	NAACL	2016	Selecting Syntactic, Non-redundant Segments in Active Learning for Machine Translation	BLEU	no	no	no	no	n/a
380	NAACL	2016	Multi-Source Neural Translation	BLEU	no	no	no	no	n/a
381	NAACL	2016	Controlling Politeness in Neural Machine Translation via Side Constraints	BLEU	no	no	no	no	n/a
382	NAACL	2016	An Empirical Evaluation of Noise Contrastive Estimation for the Neural Network Joint Model of Translation	BLEU	yes	no	no	no	n/a
383	NAACL	2016	Agreement on Target-bidirectional Neural Machine Translation	BLEU	no	no	no	no	n/a
384	NAACL	2016	Speed-Constrained Tuning for Statistical Machine Translation Using Bayesian Optimization	BLEU	no	no	no	no	n/a
385	NAACL	2016	Multi-Way, Multilingual Neural Machine Translation with a Shared Attention Mechanism	BLEU	no	no	no	no	n/a
386	NAACL	2016	Incorporating Structural Alignment Biases into an Attentional Neural Translation Model	BLEU	yes	no	no	no	n/a
387	NAACL	2016	An Attentional Model for Speech Translation Without Transcription	BLEU	no	no	no	no	n/a
388	NAACL	2016	LSTM Neural Reordering Feature for Statistical Machine Translation	BLEU	yes	no	no	no	n/a
389	NAACL	2016	A Novel Approach to Dropped Pronoun Translation	BLEU	no	no	no	no	n/a
390	NAACL	2016	Interlocking Phrases in Phrase-based Statistical Machine Translation	BLEU	no	no	no	no	n/a
391	NAACL	2016	Bootstrapping Translation Detection and Sentence Extraction from Comparable Corpora	BLEU	yes	no	no	no	n/a
392	NAACL	2016	PRIMT: A Pick-Revise Framework for Interactive Machine Translation	BLEU	no	no	no	no	n/a
393	ConLL	2016	Beyond Prefix-Based Interactive Translation Prediction	BLEU, TER	yes	no	no	no	n/a
394	ConLL	2016	Compression of Neural Machine Translation Models via Pruning	BLEU	no	no	no	no	n/a
395	ConLL	2016	Semi-supervised Convolutional Networks for Translation Adaptation with Tiny Amount of In-domain Data	BLEU	yes	no	no	no	n/a
396	ACL	2017	A Convolutional Encoder Model for Neural Machine Translation	BLEU	no	no	yes	no	no
397	ACL	2017	Deep Neural Machine Translation with Linear Associative Unit	BLEU	no	no	yes	no	no
398	ACL	2017	Modeling Source Syntax for Neural Machine Translation	BLEU	yes	no	no	no	n/a
399	ACL	2017	Sequence-to-Dependency Neural Machine Translation	BLEU, RIBES	yes	no	yes	no	no
400	ACL	2017	Neural Machine Translation via Binary Code Prediction	BLEU	no	no	no	no	n/a
401	ACL	2017	What do Neural Machine Translation Models Learn about Morphology?	BLEU	no	no	no	no	n/a
402	ACL	2017	Prior Knowledge Integration for Neural Machine Translation using Posterior Regularization	BLEU	yes	no	no	no	n/a
403	ACL	2017	Incorporating Word Reordering Knowledge into Attention-based Neural Machine Translation	BLEU	yes	no	yes	no	no
404	ACL	2017	Chunk-based Decoder for Neural Machine Translation	BLEU, RIBES	no	no	yes	no	no
405	ACL	2017	Doubly-Attentive Decoder for Multi-modal Neural Machine Translation	BLEU, METEOR, TER, chrF	yes	no	yes	no	no
406	ACL	2017	A Teacher-Student Framework for Zero-Resource Neural Machine Translation	BLEU	no	no	yes	no	no
407	ACL	2017	Improved Neural Machine Translation with a Syntax-Aware Encoder and Decoder	BLEU	no	no	no	no	n/a
408	ACL	2017	Learning to Parse and Translate Improves Neural Machine Translation	BLEU, RIBES	yes	no	no	no	n/a
409	ACL	2017	Hybrid Neural Network Alignment and Lexicon Model in Direct HMM for Statistical Machine Translation	BLEU, TER	yes	no	no	no	n/a
410	ACL	2017	Towards String-To-Tree Neural Machine Translation	BLEU	no	yes	no	no	n/a
411	ACL	2017	Neural System Combination for Machine Translation	BLEU, RIBES	no	no	no	no	n/a
412	ACL	2017	An Empirical Comparison of Domain Adaptation Methods for Neural Machine Translation	BLEU	yes	no	no	no	n/a
413	ACL	2017	Sentence Embedding for Neural Machine Translation Domain Adaptation	BLEU	no	no	no	no	n/a
414	ACL	2017	Data Augmentation for Low-Resource Neural Machine Translation	BLEU	yes	no	no	no	n/a
415	ACL	2017	Speeding Up Neural Machine Translation Decoding by Shrinking Run-time Vocabulary	BLEU	no	no	no	no	n/a
416	ACL	2017	Chunk-Based Bi-Scale Decoder for Neural Machine Translation	BLEU	no	yes	no	no	n/a
417	ACL	2017	Challenging Language-Dependent Segmentation for Arabic: An Application to Machine Translation and Part-of-Speech Tagging	BLEU	no	no	no	no	n/a
418	EACL	2017	Personalized Machine Translation: Preserving Original Author Traits	BLEU	yes	no	no	no	n/a
419	EACL	2017	Online Automatic Post-editing for MT in a Multi-Domain Translation Environment	BLEU, TER	yes	no	no	no	n/a
420	EACL	2017	Consistent Translation of Repeated Nouns using Syntactic and Semantic Cues	BLEU	no	no	no	no	n/a
421	EACL	2017	Learning to Translate in Real-time with Neural Machine Translation	BLEU	no	no	no	no	n/a
422	EACL	2017	A Multifaceted Evaluation of Neural versus Phrase-Based Machine Translation for 9 Language Directions	BLEU	yes	yes	yes	no	no
423	EACL	2017	A Parallel Corpus for Evaluating Machine Translation between Arabic and European Languages	BLEU	no	no	no	no	n/a
424	EACL	2017	Neural vs. Phrase-Based Machine Translation in a Multi-Domain Scenario	BLEU	no	no	no	no	n/a
425	EACL	2017	Neural Machine Translation by Minimising the Bayes-risk with Respect to Syntactic Translation Lattices	BLEU	no	no	no	no	n/a
426	EACL	2017	Producing Unseen Morphological Variants in Statistical Machine Translation	BLEU	no	no	no	no	n/a
427	EACL	2017	How Grammatical is Character-level Neural Machine Translation? Assessing MT Quality with Contrastive Translation Pairs	BLEU	yes	no	yes	no	no
428	EACL	2017	Neural Machine Translation with Recurrent Attention Modeling	BLEU	no	no	yes	no	no
429	EACL	2017	Context-Aware Graph Segmentation for Graph-Based Translation	BLEU	yes	no	no	no	n/a
430	EACL	2017	Lexicalized Reordering for Left-to-Right Hierarchical Phrase-based Translation	BLEU	yes	no	no	no	n/a
431	EACL	2017	Using Images to Improve Machine-Translating E-Commerce Product Listings.	BLEU, TER	yes	no	no	no	n/a
432	EACL	2017	Co-reference Resolution of Elided Subjects and Possessive Pronouns in Spanish-English Statistical Machine Translation	BLEU	no	no	no	no	n/a
433	EMNLP	2017	Neural Machine Translation with Source-Side Latent Graph Parsing	BLEU, RIBES	no	no	yes	no	no
434	EMNLP	2017	Neural Machine Translation with Word Predictions	BLEU	no	no	no	no	n/a
435	EMNLP	2017	Towards Decoding as Continuous Optimisation in Neural Machine Translation	BLEU	yes	no	no	no	n/a
436	EMNLP	2017	An empirical study on the effectiveness of images in Multimodal Neural Machine Translation	BLEU, METEOR, TER	no	no	yes	no	no
437	EMNLP	2017	Incorporating Global Visual Features into Attention-based Neural Machine Translation.	BLEU, METEOR, TER, chrF	yes	no	yes	no	no
438	EMNLP	2017	Memory-augmented Neural Machine Translation	BLEU	no	no	no	no	n/a
439	EMNLP	2017	Dynamic Data Selection for Neural Machine Translation	BLEU	no	no	no	no	n/a
440	EMNLP	2017	Neural Machine Translation Leveraging Phrase-based Models in a Hybrid Search	BLEU, TER	no	yes	no	no	n/a
441	EMNLP	2017	Translating Phrases in Neural Machine Translation	BLEU	yes	no	no	no	n/a
442	EMNLP	2017	Towards Bidirectional Hierarchical Representations for Attention-based Neural Machine Translation	BLEU	yes	no	no	no	n/a
443	EMNLP	2017	Massive Exploration of Neural Machine Translation Architectures	BLEU	yes	no	yes	no	no
444	EMNLP	2017	Reinforcement Learning for Bandit Neural Machine Translation with Simulated Human Feedback	BLEU	no	no	no	no	n/a
445	EMNLP	2017	Towards Compact and Fast Neural Machine Translation Using a Combined Method	BLEU	no	no	no	no	n/a
446	EMNLP	2017	Instance Weighting for Neural Machine Translation Domain Adaptation	BLEU	yes	no	no	no	n/a
447	EMNLP	2017	Neural Machine Translation with Source Dependency Representation	BLEU	yes	no	no	no	n/a
448	EMNLP	2017	Regularization techniques for fine-tuning in neural machine translation	BLEU	yes	no	no	no	n/a
449	EMNLP	2017	Using Target-side Monolingual Data for Neural Machine Translation through Multi-task Learning	BLEU, METEOR, TER	no	no	no	no	n/a
450	EMNLP	2017	Unfolding and Shrinking Neural Machine Translation Ensembles	BLEU	no	no	no	no	n/a
451	EMNLP	2017	Graph Convolutional Encoders for Syntax-aware Neural Machine Translation	BLEU	no	no	no	no	n/a
452	EMNLP	2017	Trainable Greedy Decoding for Neural Machine Translation	BLEU	yes	no	no	no	n/a
453	EMNLP	2017	Counterfactual Learning from Bandit Feedback under Deterministic Logging : A Case Study in Statistical Machine Translation	BLEU	yes	no	no	no	n/a
454	EMNLP	2017	A Study of Style in Machine Translation: Controlling the Formality of Machine Translation Output	BLEU	yes	yes	no	no	n/a
455	EMNLP	2017	Sharp Models on Dull Hardware: Fast and Accurate Neural Machine Translation Decoding on the CPU	BLEU	no	no	yes	no	no
456	EMNLP	2017	Exploiting Cross-Sentence Context for Neural Machine Translation	BLEU	yes	no	no	no	n/a
457	CoNLL	2017	Top-Rank Enhanced Listwise Optimization for Statistical Machine Translation	BLEU	yes	no	no	no	n/a
458	ACL	2018	Unsupervised Neural Machine Translation with Weight Sharing	BLEU	no	no	yes	no	no
459	ACL	2018	Triangular Architecture for Rare Language Translation	BLEU	no	no	no	no	n/a
460	ACL	2018	Subword Regularization: Improving Neural Network Translation Models with Multiple Subword Candidates	BLEU	yes	no	no	no	n/a
461	ACL	2018	The Best of Both Worlds: Combining Recent Advances in Neural Machine Translation	BLEU	no	no	yes	no	no
462	ACL	2018	A Stochastic Decoder for Neural Machine Translation	BLEU	no	no	no	no	n/a
463	ACL	2018	Forest-Based Neural Machine Translation	BLEU	yes	no	no	no	n/a
464	ACL	2018	Context-Aware Neural Machine Translation Learns Anaphora Resolution	BLEU	yes	no	no	no	n/a
465	ACL	2018	Document Context Neural Machine Translation with Memory Networks	BLEU, METEOR	yes	no	no	no	n/a
466	ACL	2018	Towards Robust Neural Machine Translation	BLEU	no	no	yes	no	no
467	ACL	2018	Attention Focusing for Neural Machine Translation by Bridging Source and Target Embeddings	BLEU, TER	yes	no	no	no	n/a
468	ACL	2018	How Much Attention Do You Need? A Granular Analysis of Neural Machine Translation Architectures	BLEU, METEOR	no	no	yes	no	yes
469	ACL	2018	A Simple and Effective Approach to Coverage-Aware Neural Machine Translation	BLEU	no	no	no	no	n/a
470	ACL	2018	Dynamic Sentence Sampling for Efficient Training of Neural Machine Translation	BLEU	yes	no	no	no	n/a
471	ACL	2018	Compositional Representation of Morphologically-Rich Input for Neural Machine Translation	BLEU	yes	no	no	no	n/a
472	ACL	2018	Extreme Adaptation for Personalized Neural Machine Translation	BLEU	yes	no	no	no	n/a
473	ACL	2018	Learning from Chunk-based Feedback in Neural Machine Translation	BLEU, TER	no	no	no	no	n/a
474	ACL	2018	Bag-of-Words as Target for Neural Machine Translation	BLEU	no	no	yes	no	no
475	ACL	2018	Improving Beam Search by Removing Monotonic Constraint for Neural Machine Translation	BLEU	no	no	no	no	n/a
476	ACL	2018	Sparse and Constrained Attention for Neural Machine Translation	BLEU, METEOR	no	no	no	no	n/a
477	ACL	2018	Neural Hidden Markov Model for Machine Translation	BLEU, TER	no	no	no	no	n/a
478	ACL	2018	Adaptive Knowledge Sharing in Multi-Task Learning: Improving Low-Resource Neural Machine Translation	BLEU, TER	no	no	no	no	n/a
479	ACL	2018	Multi-representation Ensembles and Delayed SGD Updates Improve Syntax-based NMT	BLEU	yes	no	yes	no	no
480	EMNLP	2018	Addressing Troublesome Words in Neural Machine Translation	BLEU	yes	no	no	no	n/a
481	EMNLP	2018	Top-down Tree Structured Decoding with Syntactic Connections for Neural Machine Translation and Parsing	BLEU, RIBES	no	no	yes	no	no
482	EMNLP	2018	Contextual Parameter Generation for Universal Neural Machine Translation	BLEU, METEOR	no	no	no	no	n/a
483	EMNLP	2018	Back-Translation Sampling by Targeting Difficult Words in Neural Machine Translation	BLEU	no	no	no	no	n/a
484	EMNLP	2018	Multi-Domain Neural Machine Translation with Word-Level Domain Context Discrimination	BLEU	no	no	no	no	n/a
485	EMNLP	2018	Semi-Autoregressive Neural Machine Translation	BLEU	no	no	yes	no	no
486	EMNLP	2018	Understanding Back-Translation at Scale	BLEU	no	no	yes	yes	no
487	EMNLP	2018	Adaptive Multi-pass Decoder for Neural Machine Translation	BLEU	no	no	no	no	n/a
488	EMNLP	2018	Improving the Transformer Translation Model with Document-Level Context	BLEU	yes	yes	yes	no	no
489	EMNLP	2018	MTNT: A Testbed for Machine Translation of Noisy Text	BLEU	no	no	no	yes	n/a
490	EMNLP	2018	SwitchOut: an Efficient Data Augmentation Algorithm for Neural Machine Translation	BLEU	yes	no	no	no	n/a
491	EMNLP	2018	Improving Unsupervised Word-by-Word Translation with Language Model and Denoising Autoencoder	BLEU	no	no	yes	no	no
492	EMNLP	2018	Rapid Adaptation of Neural Machine Translation to New Languages	BLEU	no	no	no	no	n/a
493	EMNLP	2018	Compact Personalized Models for Neural Machine Translation	BLEU	no	no	no	no	n/a
494	EMNLP	2018	Document-Level Neural Machine Translation with Hierarchical Attention Networks	BLEU	yes	no	no	no	n/a
495	EMNLP	2018	Three Strategies to Improve One-to-Many Multilingual Translation	BLEU	no	no	no	no	n/a
496	EMNLP	2018	Multi-Source Syntactic Neural Machine Translation	BLEU	no	no	no	no	n/a
497	EMNLP	2018	Fixing Translation Divergences in Parallel Corpora for Neural MT	BLEU	no	no	no	no	n/a
498	EMNLP	2018	Learning When to Concentrate or Divert Attention: Self-Adaptive Attention Temperature for Neural Machine Translation	BLEU	no	no	yes	no	no
499	EMNLP	2018	Accelerating Asynchronous Stochastic Gradient Descent for Neural Machine Translation	BLEU	no	no	no	no	n/a
500	EMNLP	2018	Getting Gender Right in Neural Machine Translation	BLEU	yes	no	no	no	n/a
501	EMNLP	2018	Towards Two-Dimensional Sequence to Sequence Model in Neural Machine Translation	BLEU, TER	no	no	no	no	n/a
502	EMNLP	2018	End-to-End Non-Autoregressive Neural Machine Translation with Connectionist Temporal Classification	BLEU	no	yes	yes	yes	no
503	EMNLP	2018	Prediction Improves Simultaneous Neural Machine Translation	BLEU	no	no	no	no	n/a
504	EMNLP	2018	Training Deeper Neural Machine Translation Models with Transparent Attention	BLEU	no	no	no	no	n/a
505	EMNLP	2018	Encoding Gated Translation Memory into Neural Machine Translation	BLEU	no	no	no	no	n/a
506	EMNLP	2018	Automatic Post-Editing of Machine Translation: A Neural Programmer-Interpreter Approach	BLEU, TER	yes	no	no	no	n/a
507	EMNLP	2018	Breaking the Beam Search Curse: A Study of (Re-)Scoring Methods and Stopping Criteria for Neural Machine Translation	BLEU	no	no	no	no	n/a
508	EMNLP	2018	Multi-Reference Training with Pseudo-References for Neural Translation and Text Generation	BLEU	no	no	no	no	n/a
509	EMNLP	2018	Beyond Error Propagation in Neural Machine Translation: Characteristics of Language Also Matter	BLEU	no	no	no	no	n/a
510	EMNLP	2018	A Study of Reinforcement Learning for Neural Machine Translation	BLEU	yes	no	yes	yes	no
511	EMNLP	2018	Meta-Learning for Low-Resource Neural Machine Translation	BLEU	no	no	no	no	n/a
512	EMNLP	2018	Unsupervised Statistical Machine Translation	BLEU	no	no	yes	no	no
513	EMNLP	2018	A Visual Attention Grounding Neural Model for Multimodal Machine Translation	BLEU, METEOR	no	yes	yes	no	no
514	EMNLP	2018	Exploiting Deep Representations for Neural Machine Translation	BLEU	yes	no	yes	no	no
515	EMNLP	2018	Why Self-Attention? A Targeted Evaluation of Neural Machine Translation Architectures	BLEU	no	no	yes	yes	no
516	EMNLP	2018	Simplifying Neural Machine Translation with Addition-Subtraction Twin-Gated Recurrent Networks	BLEU	no	no	yes	no	no
517	EMNLP	2018	Speeding Up Neural Machine Translation Decoding by Cube Pruning	BLEU	no	no	no	no	n/a
518	EMNLP	2018	Revisiting Character-Based Neural Machine Translation with Capacity and Compression	BLEU	no	no	yes	yes	no
519	EMNLP	2018	A Tree-based Decoder for Neural Machine Translation	BLEU	yes	no	no	no	n/a
520	EMNLP	2018	Greedy Search with Probabilistic N-gram Matching for Neural Machine Translation	BLEU	no	no	no	no	n/a
521	EMNLP	2018	Exploring Recombination for Efficient Decoding of Neural Machine Translation	BLEU	no	no	no	no	n/a
522	EMNLP	2018	Has Machine Translation Achieved Human Parity? A Case for Document-level Evaluation	n/a	yes	yes	yes	no	no
523	EMNLP	2018	Phrase-Based & Neural Unsupervised Machine Translation	BLEU	no	no	yes	no	no
524	NAACL	2018	Accelerating NMT Batched Beam Decoding with LMBR Posteriors for Deployment	BLEU	no	no	no	no	n/a
525	NAACL	2018	Improving Character-Based Decoding Using Target-Side Morphological Information for Neural Machine Translation	BLEU	yes	no	yes	no	no
526	NAACL	2018	Tied Multitask Learning for Neural Speech Translation	BLEU	yes	no	no	no	n/a
527	NAACL	2018	QuickEdit: Editing Text & Translations by Crossing Words Out	BLEU	no	no	no	no	n/a
528	NAACL	2018	Improving Lexical Choice in Neural Machine Translation	BLEU	yes	no	no	no	n/a
529	NAACL	2018	Universal Neural Machine Translation for Extremely Low Resource Languages	BLEU	no	no	no	no	n/a
530	NAACL	2018	Combining Character and Word Information in Neural Machine Translation Using a Multi-Level Attention	BLEU	no	no	no	no	n/a
531	NAACL	2018	Dense Information Flow for Neural Machine Translation	BLEU	no	no	yes	no	no
532	NAACL	2018	Evaluating Discourse Phenomena in Neural Machine Translation	BLEU	no	no	no	no	n/a
533	NAACL	2018	Fast Lexically Constrained Decoding with Dynamic Beam Allocation for Neural Machine Translation	BLEU	no	no	no	yes	n/a
534	NAACL	2018	Guiding Neural Machine Translation with Retrieved Translation Pieces	BLEU, METEOR	no	no	yes	no	yes
535	NAACL	2018	Handling Homographs in Neural Machine Translation	BLEU	yes	no	no	no	n/a
536	NAACL	2018	Improving Neural Machine Translation with Conditional Sequence Generative Adversarial Nets	BLEU	no	no	yes	no	no
537	NAACL	2018	Neural Machine Translation for Bilingually Scarce Scenarios: a Deep Multi-Task Learning Approach	BLEU	no	no	no	no	n/a
538	NAACL	2018	Self-Attentive Residual Decoder for Neural Machine Translation	BLEU	yes	yes	yes	no	no
539	NAACL	2018	Target Foresight Based Attention for Neural Machine Translation	BLEU	yes	no	yes	no	no
540	NAACL	2018	Neural Poetry Translation	n/a	no	yes	no	no	n/a
541	NAACL	2018	Automated Paraphrase Lattice Creation for HyTER Machine Translation Evaluation	Hytera, Hyter, HTER, BLEU	no	yes	no	no	n/a
542	NAACL	2018	Exploiting Semantics in Neural Machine Translation with Graph Convolutional Networks	BLEU	no	no	no	no	n/a
543	NAACL	2018	Incremental Decoding and Training Methods for Simultaneous Translation in Neural Machine Translation	BLEU	no	no	no	no	n/a
544	NAACL	2018	Learning Hidden Unit Contribution for Adapting Neural Machine Translation Models	BLEU	no	no	no	no	n/a
545	NAACL	2018	Neural Machine Translation Decoding with Terminology Constraints	BLEU	no	no	no	no	n/a
546	NAACL	2018	Using Word Vectors to Improve Word Alignments for Low Resource Machine Translation	BLEU	no	no	no	no	n/a
547	NAACL	2018	When and Why Are Pre-Trained Word Embeddings Useful for Neural Machine Translation?	BLEU	no	no	no	no	n/a
548	ConLL	2018	Active Learning for Interactive Neural Machine Translation of Data Streams	BLEU	no	no	no	no	n/a
549	ConLL	2018	Bidirectional Generative Adversarial Networks for Neural Machine Translation	BLEU	no	no	yes	no	no
550	ConLL	2018	Learning to Actively Learn Neural Machine Translation	BLEU	no	no	no	no	n/a
551	ConLL	2018	Sequence to Sequence Mixture Model for Diverse Machine Translation	BLEU	no	no	no	no	n/a
552	ACL	2019	Unsupervised Pivot Translation for Distant Languages	BLEU	no	no	no	no	n/a
553	ACL	2019	An Effective Approach to Unsupervised Machine Translation	BLEU	no	no	yes	yes	no
554	ACL	2019	Effective Adversarial Regularization for Neural Machine Translation	BLEU	no	no	no	no	n/a
555	ACL	2019	Revisiting Low-Resource Neural Machine Translation: A Case Study	BLEU	no	no	yes	yes	no
556	ACL	2019	Domain Adaptive Inference for Neural Machine Translation	BLEU	no	no	no	yes	n/a
557	ACL	2019	When a Good Translation is Wrong in Context: Context-Aware Machine Translation Improves on Deixis, Ellipsis, and Lexical Cohesion	BLEU	yes	yes	no	no	n/a
558	ACL	2019	A Compact and Language-Sensitive Multilingual Translation Method	BLEU	no	no	no	no	n/a
559	ACL	2019	Unsupervised Parallel Sentence Extraction with Parallel Segment Detection Helps Machine Translation	BLEU	no	no	no	no	n/a
560	ACL	2019	Unsupervised Bilingual Word Embedding Agreement for Unsupervised Neural Machine Translation	BLEU	yes	no	yes	no	no
561	ACL	2019	Effective Cross-lingual Transfer of Neural Machine Translation Models without Shared Vocabularies	BLEU	no	no	no	no	n/a
562	ACL	2019	Improved Zero-shot Neural Machine Translation via Ignoring Spurious Correlations	BLEU	no	no	no	no	n/a
563	ACL	2019	Syntactically Supervised Transformers for Faster Neural Machine Translation	BLEU	no	no	yes	yes	no
564	ACL	2019	Dynamically Composing Domain-Data Selection with Clean-Data Selection by “Co-Curricular Learning” for Neural Machine Translation	BLEU	no	no	no	no	n/a
565	ACL	2019	Imitation Learning for Non-Autoregressive Neural Machine Translation	BLEU	no	no	yes	no	no
566	ACL	2019	Monotonic Infinite Lookback Attention for Simultaneous Machine Translation	BLEU	no	no	no	no	n/a
567	ACL	2019	Neural Machine Translation with Reordering Embeddings	BLEU	yes	no	yes	yes	no
568	ACL	2019	Neural Fuzzy Repair: Integrating Fuzzy Matches into Neural Machine Translation	BLEU, TER, METEOR	yes	no	yes	no	no
569	ACL	2019	Learning Deep Transformer Models for Machine Translation	BLEU	no	no	yes	no	no
570	ACL	2019	Generating Diverse Translations with Sentence Codes	BLEU	no	no	no	yes	n/a
571	ACL	2019	Self-Supervised Neural Machine Translation	BLEU	no	no	yes	no	no
572	ACL	2019	Exploring Phoneme-Level Speech Representations for End-to-End Speech Translation	BLEU	no	no	no	no	n/a
573	ACL	2019	Domain Adaptation of Neural Machine Translation by Lexicon Induction	BLEU	no	no	no	no	n/a
574	ACL	2019	Reference Network for Neural Machine Translation	BLEU	no	no	yes	no	no
575	ACL	2019	Retrieving Sequential Information for Non-Autoregressive Neural Machine Translation	BLEU	no	no	yes	no	no
576	ACL	2019	STACL: Simultaneous Translation with Implicit Anticipation and Controllable Latency using Prefix-to-Prefix Framework	BLEU	no	yes	no	no	n/a
577	ACL	2019	Look Harder: A Neural Machine Translation Model with Hard Attention	BLEU	no	no	yes	yes	no
578	ACL	2019	Robust Neural Machine Translation with Joint Textual and Phonetic Embedding	BLEU	no	no	no	no	n/a
579	ACL	2019	Translating Translationese: A Two-Step Approach to Unsupervised Machine Translation	BLEU	no	no	yes	no	no
580	ACL	2019	Training Neural Machine Translation to Apply Terminology Constraints	BLEU	yes	no	no	no	n/a
581	ACL	2019	Sentence-Level Agreement for Neural Machine Translation	BLEU	yes	no	yes	yes	no
582	ACL	2019	Lattice-Based Transformer Encoder for Neural Machine Translation	BLEU	yes	no	yes	no	no
583	ACL	2019	Shared-Private Bilingual Word Embeddings for Neural Machine Translation	BLEU	yes	no	yes	no	no
584	ACL	2019	Robust Neural Machine Translation with Doubly Adversarial Inputs	BLEU	no	no	yes	no	no
585	ACL	2019	Bridging the Gap between Training and Inference for Neural Machine Translation	BLEU	yes	no	yes	no	no
586	ACL	2019	Beyond BLEU:Training Neural Machine Translation with Semantic Similarity	BLEU	yes	yes	no	no	n/a
587	ACL	2019	Soft Contextual Data Augmentation for Neural Machine Translation	BLEU	no	no	no	no	n/a
588	ACL	2019	Depth Growing for Neural Machine Translation	BLEU	yes	no	yes	no	no
589	ACL	2019	Generalized Data Augmentation for Low-Resource Translation	BLEU	yes	no	yes	no	no
590	ACL	2019	Better OOV Translation with Bilingual Terminology Mining	BLEU	no	no	no	no	n/a
591	ACL	2019	Simultaneous Translation with Flexible Policy via Restricted Imitation Learning	BLEU	no	no	no	no	n/a
592	ACL	2019	Target Conditioned Sampling: Optimizing Data Selection for Multilingual Neural Machine Translation	BLEU	yes	no	no	no	n/a
593	ACL	2019	Reducing Word Omission Errors in Neural Machine Translation: A Contrastive Learning Approach	BLEU	yes	yes	no	no	n/a
594	ACL	2019	Exploiting Sentential Context for Neural Machine Translation	BLEU	yes	no	no	no	n/a
595	ACL	2019	Latent Variable Model for Multi-modal Translation	BLEU, chrF, METEOR, BEER	no	no	yes	no	no
596	ACL	2019	Lattice Transformer for Speech Translation	BLEU	no	no	yes	no	no
597	ACL	2019	Distilling Translations with Visual Awareness	BLEU, METEOR	yes	yes	yes	no	no
598	ACL	2019	Multilingual Unsupervised NMT using Shared Encoder and Language-Specific Decoders	BLEU	no	no	no	no	n/a
599	EMNLP	2019	On NMT Search Errors and Model Errors: Cat Got Your Tongue?	BLEU	no	no	no	no	n/a
600	EMNLP	2019	Investigating Multilingual NMT Representations at Scale	BLEU	no	no	no	no	n/a
601	EMNLP	2019	Explicit Cross-lingual Pre-training for Unsupervised Machine Translation	BLEU	yes	no	yes	no	no
602	EMNLP	2019	Latent Part-of-Speech Sequences for Neural Machine Translation	BLEU	no	no	yes	no	no
603	EMNLP	2019	Improving Back-Translation with Uncertainty-based Confidence Estimation	BLEU	yes	no	no	no	n/a
604	EMNLP	2019	Towards Linear Time Neural Machine Translation with Capsule Networks	BLEU	no	no	yes	no	no
605	EMNLP	2019	Iterative Dual Domain Adaptation for Neural Machine Translation	BLEU	yes	no	no	no	n/a
606	EMNLP	2019	Multi-agent Learning for Neural Machine Translation	BLEU	no	no	yes	no	no
607	EMNLP	2019	Pivot-based Transfer Learning for Neural Machine Translation between Non-English Languages	BLEU, TER	no	no	no	no	n/a
608	EMNLP	2019	Context-Aware Monolingual Repair for Neural Machine Translation	BLEU	no	yes	no	no	n/a
609	EMNLP	2019	Multi-Granularity Self-Attention for Neural Machine Translation	BLEU	yes	no	yes	no	no
610	EMNLP	2019	One Model to Learn Both: Zero Pronoun Prediction and Translation	BLEU	yes	yes	no	no	n/a
611	EMNLP	2019	Dynamic Past and Future for Neural Machine Translation	BLEU	no	yes	yes	no	no
612	EMNLP	2019	Towards Understanding Neural Machine Translation with Word Importance	BLEU	no	no	no	no	n/a
613	EMNLP	2019	Multilingual Neural Machine Translation with Language Clustering	BLEU	no	no	no	no	n/a
614	EMNLP	2019	Simpler and Faster Learning of Adaptive Policies for Simultaneous Translation	BLEU	no	no	no	no	n/a
615	EMNLP	2019	Recurrent Positional Embedding for Neural Machine Translation	BLEU	yes	no	yes	no	no
616	EMNLP	2019	Handling Syntactic Divergence in Low-resource Machine Translation	BLEU, RIBES	no	no	no	no	n/a
617	EMNLP	2019	Speculative Beam Search for Simultaneous Translation	BLEU	no	no	no	no	n/a
618	EMNLP	2019	Exploiting Multilingualism through Multistage Fine-Tuning for Low-Resource Neural Machine Translation	BLEU	yes	no	no	no	n/a
619	EMNLP	2019	Unsupervised Domain Adaptation for Neural Machine Translation with Domain-Aware Feature Embeddings	BLEU	no	no	no	no	n/a
620	EMNLP	2019	Enhancing Context Modeling with a Query-Guided Capsule Network for Document-level Translation	BLEU, METEOR	no	no	no	no	n/a
621	EMNLP	2019	Simple, Scalable Adaptation for Neural Machine Translation	BLEU	no	no	no	no	n/a
622	EMNLP	2019	Controlling Text Complexity in Neural Machine Translation	BLEU	no	no	no	no	n/a
623	EMNLP	2019	Hierarchical Modeling of Global Context for Document-Level Neural Machine Translation	BLEU	yes	no	no	no	n/a
624	EMNLP	2019	Exploiting Monolingual Data at Scale for Neural Machine Translation	BLEU	no	no	yes	yes	no
625	EMNLP	2019	Machine Translation With Weakly Paired Documents	BLEU	no	no	yes	no	no
626	EMNLP	2019	Understanding Data Augmentation in Neural Machine Translation: Two Perspectives towards Generalization	BLEU	no	no	no	no	n/a
627	EMNLP	2019	Simple and Effective Noisy Channel Modeling for Neural Machine Translation	BLEU	no	no	no	no	n/a
628	EMNLP	2019	Hint-Based Training for Non-Autoregressive Machine Translation	BLEU	no	no	yes	no	no
629	EMNLP	2019	The FLORES Evaluation Datasets for Low-Resource Machine Translation: Nepali–English and Sinhala–English	BLEU	no	no	no	yes	n/a
630	EMNLP	2019	HABLex: Human Annotated Bilingual Lexicons for Experiments in Machine Translation	BLEU	no	no	no	no	n/a
631	EMNLP	2019	Encoders Help You Disambiguate Word Senses in Neural Machine Translation	BLEU	no	no	no	no	n/a
632	NAACL	2019	Pre-training on high-resource speech recognition improves low-resource speech-to-text translation	BLEU, METEOR	no	no	no	no	n/a
633	NAACL	2019	ReWE: Regressing Word Embeddings for Regularization of Neural Machine Translation Systems	BLEU	yes	no	yes	no	no
634	NAACL	2019	Lost in Machine Translation: A Method to Reduce Meaning Loss	BLEU	no	no	no	yes	n/a
635	NAACL	2019	Code-Switching for Enhancing NMT with Pre-Specified Translation	BLEU	no	no	no	no	n/a
636	NAACL	2019	Bi-Directional Differentiable Input Reconstruction for Low-Resource Neural Machine Translation	BLEU	yes	no	no	yes	n/a
637	NAACL	2019	Understanding and Improving Hidden Representations for Neural Machine Translation	BLEU	no	no	yes	no	no
638	NAACL	2019	Syntax-Enhanced Neural Machine Translation with Syntax-Aware Word Representations	BLEU	yes	no	yes	no	no
639	NAACL	2019	Competence-based Curriculum Learning for Neural Machine Translation	BLEU	no	no	no	no	n/a
640	NAACL	2019	Extract and Edit: An Alternative to Back-Translation for Unsupervised Neural Machine Translation	BLEU	no	no	yes	no	no
641	NAACL	2019	Consistency by Agreement in Zero-Shot Neural Machine Translation	BLEU	no	no	yes	no	no
642	NAACL	2019	Learning to Stop in Structured Prediction for Neural Machine Translation	BLEU	no	no	yes	no	no
643	NAACL	2019	Curriculum Learning for Domain Adaptation in Neural Machine Translation	BLEU	no	no	no	no	n/a
644	NAACL	2019	Improving Robustness of Machine Translation with Synthetic Noise	BLEU	no	no	no	no	n/a
645	NAACL	2019	Non-Parametric Adaptation for Neural Machine Translation	BLEU	no	no	no	no	n/a
646	NAACL	2019	Online Distilling from Checkpoints for Neural Machine Translation	BLEU	no	no	yes	yes	no
647	NAACL	2019	MuST-C: a Multilingual Speech Translation Corpus	BLEU	no	no	no	no	n/a
648	NAACL	2019	Improving Neural Machine Translation with Neural Syntactic Distance	BLEU	no	no	no	no	n/a
649	NAACL	2019	Measuring Immediate Adaptation Performance for Neural Machine Translation	BLEU, TER	no	no	no	no	n/a
650	NAACL	2019	Differentiable Sampling with Flexible Reference Word Order for Neural Machine Translation	BLEU	yes	no	no	no	n/a
651	NAACL	2019	Reinforcement Learning based Curriculum Optimization for Neural Machine Translation	BLEU	no	no	no	no	n/a
652	NAACL	2019	Overcoming Catastrophic Forgetting During Domain Adaptation of Neural Machine Translation	BLEU	no	no	no	no	n/a
653	NAACL	2019	Fluent Translations from Disfluent Speech in End-to-End Speech Translation	BLEU, METEOR	no	no	yes	no	no
654	NAACL	2019	Neural Machine Translation of Text from Non-Native Speakers	BLEU	no	no	no	no	n/a
655	NAACL	2019	Improving Domain Adaptation Translation with Domain Invariant and Specific Information	BLEU	yes	no	yes	no	no
656	NAACL	2019	Selective Attention for Context-aware Neural Machine Translation	BLEU, METEOR	yes	no	no	no	n/a
657	NAACL	2019	Unsupervised Extraction of Partial Translations for Neural Machine Translation	BLEU	no	no	no	no	n/a
658	NAACL	2019	Addressing word-order Divergence in Multilingual Neural Machine Translation for extremely Low Resource Languages	BLEU, LeBLEU	yes	no	no	no	n/a
659	NAACL	2019	Massively Multilingual Neural Machine Translation	BLEU	no	no	yes	no	no
660	NAACL	2019	Probing the Need for Visual Context in Multimodal Machine Translation	METEOR	yes	no	no	no	n/a
661	NAACL	2019	Improved Lexically Constrained Decoding for Translation and Monolingual Rewriting	BLEU	no	no	no	yes	n/a
662	NAACL	2019	One Size Does Not Fit All: Comparing NMT Representations of Different Granularities	BLEU	no	no	no	no	n/a
663	CoNLL	2019	Improving Neural Machine Translation by Achieving Knowledge Transfer with Sentence Alignment Learning	BLEU	no	no	no	no	n/a
664	CoNLL	2019	Unsupervised Neural Machine Translation with Future Rewarding	BLEU	no	no	yes	no	no
665	CoNLL	2019	Automatically Extracting Challenge Sets for Non-Local Phenomena in Neural Machine Translation	BLEU	no	no	no	no	n/a
666	CoNLL	2019	On the Relation between Position Information and Sentence Length in Neural Machine Translation	BLEU	yes	no	no	no	n/a
667	AACL	2020	Touch Editing: A Flexible One-Time Interaction Approach for Translation	BLEU, TER, RIBES	no	no	yes	no	no
668	AACL	2020	A General Framework for Adaptation of Neural Machine Translation to Simultaneous Translation	BLEU	no	no	no	no	n/a
669	AACL	2020	Towards a Better Understanding of Label Smoothing in Neural Machine Translation	BLEU	no	no	no	no	n/a
670	AACL	2020	Predicting and Using Target Length in Neural Machine Translation	BLEU, characTER	no	no	no	no	n/a
671	AACL	2020	SimulMT to SimulST: Adapting Simultaneous Text Translation to End-to-End Simultaneous Speech Translation	BLEU	no	no	no	yes	n/a
672	ACL	2020	Content Word Aware Neural Machine Translation	BLEU	yes	no	yes	no	no
673	ACL	2020	Jointly Masked Sequence-to-Sequence Model for Non-Autoregressive Neural Machine Translation	BLEU	no	no	yes	no	no
674	ACL	2020	Learning Source Phrase Representations for Neural Machine Translation	BLEU	yes	no	no	no	n/a
675	ACL	2020	Multiscale Collaborative Deep Models for Neural Machine Translation	BLEU	no	no	yes	no	no
676	ACL	2020	Norm-Based Curriculum Learning for Neural Machine Translation	BLEU	no	no	yes	no	no
677	ACL	2020	Opportunistic Decoding with Timely Correction for Simultaneous Translation	BLEU	no	no	no	no	n/a
678	ACL	2020	Bilingual Dictionary Based Neural Machine Translation without Using Parallel Sentences	BLEU	no	no	no	no	n/a
679	ACL	2020	Boosting Neural Machine Translation with Similar Translations	BLEU	no	no	no	no	n/a
680	ACL	2020	Character-Level Translation with Self-attention	BLEU	no	no	yes	no	no
681	ACL	2020	Enhancing Machine Translation with Dependency-Aware Self-Attention	BLEU, RIBES	yes	no	yes	yes	no
682	ACL	2020	Improving Massively Multilingual Neural Machine Translation and Zero-Shot Translation	BLEU	yes	no	no	yes	n/a
683	ACL	2020	Language-aware Interlingua for Multilingual Neural Machine Translation	BLEU	no	no	no	no	n/a
684	ACL	2020	Multi-Domain Neural Machine Translation with Word-Level Adaptive Layer-wise Domain Mixing	BLEU	no	no	yes	no	no
685	ACL	2020	Regularized Context Gates on Transformer for Machine Translation	BLEU	no	no	yes	no	no
686	ACL	2020	Improving Non-autoregressive Neural Machine Translation with Monolingual Data	BLEU	no	no	yes	no	no
687	ACL	2020	Phone Features Improve Speech Translation	BLEU	no	no	yes	no	no
688	ACL	2020	ENGINE: Energy-Based Inference Networks for Non-Autoregressive Machine Translation	BLEU	no	no	yes	no	no
689	ACL	2020	Leveraging Monolingual Data with Self-Supervision for Multilingual Neural Machine Translation	BLEU	no	no	yes	yes	no
690	ACL	2020	On The Evaluation of Machine Translation Systems Trained With Back-Translation	BLEU	yes	yes	no	yes	n/a
691	ACL	2020	Simultaneous Translation Policies: From Fixed to Adaptive	BLEU	no	no	no	no	n/a
692	ACL	2020	A Novel Graph-based Multi-modal Fusion Encoder for Neural Machine Translation	BLEU, METEOR	no	no	yes	no	no
693	ACL	2020	Dynamic Programming Encoding for Subword Segmentation in Neural Machine Translation	BLEU	no	no	no	no	n/a
694	ACL	2020	Learning to Recover from Multi-Modality Errors for Non-Autoregressive Neural Machine Translation	BLEU	no	no	yes	no	no
695	ACL	2020	On the Inference Calibration of Neural Machine Translation	BLEU	no	no	no	no	n/a
696	ACL	2020	A Reinforced Generation of Adversarial Examples for Neural Machine Translation	BLEU	no	yes	no	yes	n/a
697	ACL	2020	A Retrieve-and-Rewrite Initialization Method for Unsupervised Machine Translation	BLEU	no	no	yes	no	no
698	ACL	2020	A Simple and Effective Unified Encoder for Document-Level Machine Translation	BLEU, METEOR	no	no	yes	no	no
699	ACL	2020	Does Multi-Encoder Help? A Case Study on Context-Aware Neural Machine Translation	BLEU	no	no	no	no	n/a
700	ACL	2020	Knowledge Distillation for Multilingual Unsupervised Neural Machine Translation	BLEU	no	no	yes	no	no
701	ACL	2020	Lexically Constrained Neural Machine Translation with Levenshtein Transformer	BLEU	yes	no	yes	no	no
702	ACL	2020	On Exposure Bias, Hallucination and Domain Shift in Neural Machine Translation	BLEU	yes	yes	yes	yes	no
703	ACL	2020	Curriculum Pre-training for End-to-End Speech Translation	BLEU	no	no	yes	no	no
704	ACL	2020	SimulSpeech: End-to-End Simultaneous Speech to Text Translation	BLEU	no	no	no	no	n/a
705	ACL	2020	Selecting Backtranslated Data from Multiple Sources for Improved Neural Machine Translation	BLEU, TER, METEOR, chrF	no	no	no	no	n/a
706	ACL	2020	Modeling Word Formation in English–German Neural Machine Translation	BLEU	no	no	no	no	n/a
707	ACL	2020	Multimodal Transformer for Multimodal Machine Translation	BLEU, METEOR	yes	no	yes	no	no
708	ACL	2020	AdvAug: Robust Adversarial Augmentation for Neural Machine Translation	BLEU	no	no	yes	no	no
709	ACL	2020	Contextual Neural Machine Translation Improves Translation of Cataphoric Pronouns	BLEU	yes	no	no	no	n/a
710	ACL	2020	Improving Neural Machine Translation with Soft Template Prediction	BLEU	yes	no	yes	no	no
711	ACL	2020	Tagged Back-translation Revisited: Why Does It Really Work?	BLEU	no	no	no	yes	n/a
712	ACL	2020	Worse WER, but Better BLEU? Leveraging Word Embedding as Intermediate in Multitask End-to-End Speech Translation	BLEU	no	no	no	no	n/a
713	ACL	2020	Document Translation vs. Query Translation for Cross-Lingual Information Retrieval in the Medical Domain	BLEU, PER	yes	no	no	no	n/a
714	ACL	2020	Gender in Danger? Evaluating Speech Translation Technology on the MuST-SHE Corpus	BLEU	yes	no	no	no	n/a
715	ACL	2020	Uncertainty-Aware Curriculum Learning for Neural Machine Translation	BLEU	yes	no	no	no	n/a
716	ACL	2020	Hard-Coded Gaussian Attention for Neural Machine Translation	BLEU	no	no	no	yes	n/a
717	ACL	2020	In Neural Machine Translation, What Does Transfer Learning Transfer?	BLEU	no	no	no	yes	n/a
718	ACL	2020	Learning a Multi-Domain Curriculum for Neural Machine Translation	BLEU	no	no	yes	yes	no
719	ACL	2020	Reducing Gender Bias in Neural Machine Translation as a Domain Adaptation Problem	BLEU	no	no	no	yes	n/a
720	ACL	2020	Translationese as a Language in “Multilingual” NMT	BLEU	yes	yes	no	yes	n/a
721	ACL	2020	Using Context in Neural Machine Translation Training Objectives	BLEU, TER	no	no	no	yes	n/a
722	ACL	2020	Variational Neural Machine Translation with Normalizing Flows	BLEU	no	no	yes	yes	no
723	ACL	2020	BART: Denoising Sequence-to-Sequence Pre-training for Natural Language Generation, Translation, and Comprehension	BLEU	no	no	no	no	n/a
724	ACL	2020	Unsupervised Multimodal Neural Machine Translation with Pseudo Visual Pivoting	BLEU, METEOR	no	no	yes	no	no
725	ACL	2020	Addressing Posterior Collapse with Mutual Information for Improved Variational Neural Machine Translation	BLEU	no	no	no	yes	n/a
726	ACL	2020	Balancing Training for Multilingual Neural Machine Translation	BLEU	yes	no	no	yes	n/a
727	ACL	2020	Evaluating Robustness to Input Perturbations for Neural Machine Translation	BLEU	yes	no	no	yes	n/a
728	EMNLP	2020	Simulated multiple reference training improves low-resource machine translation	BLEU	yes	no	no	yes	n/a
729	EMNLP	2020	Accurate Word Alignment Induction from Neural Machine Translation	BLEU	yes	no	no	no	n/a
730	EMNLP	2020	ChrEn: Cherokee-English Machine Translation for Endangered Language Revitalization	BLEU	yes	yes	no	yes	n/a
731	EMNLP	2020	Shallow-to-Deep Training for Neural Machine Translation	BLEU	no	no	yes	yes	no
732	EMNLP	2020	Iterative Refinement in the Continuous Space for Non-Autoregressive Neural Machine Translation	BLEU	no	no	no	yes	n/a
733	EMNLP	2020	Multi-task Learning for Multilingual Neural Machine Translation	BLEU	no	no	no	yes	n/a
734	EMNLP	2020	Token-level Adaptive Training for Neural Machine Translation	BLEU	yes	no	no	no	n/a
735	EMNLP	2020	Multi-Unit Transformers for Neural Machine Translation	BLEU	yes	no	yes	no	no
736	EMNLP	2020	On the Sparsity of Neural Machine Translation Models	BLEU	yes	no	no	no	n/a
737	EMNLP	2020	Incorporating a Local Translation Mechanism into Non-autoregressive Translation	BLEU	no	no	no	no	n/a
738	EMNLP	2020	Self-Paced Learning for Neural Machine Translation	BLEU	yes	no	no	no	n/a
739	EMNLP	2020	Long-Short Term Masking Transformer: A Simple but Effective Baseline for Document-level Neural Machine Translation	BLEU	no	no	yes	no	no
740	EMNLP	2020	Generating Diverse Translation from Model Distribution with Dropout	BLEU	no	no	no	no	n/a
741	EMNLP	2020	Non-Autoregressive Machine Translation with Latent Alignments	BLEU	no	no	yes	no	no
742	EMNLP	2020	Dynamic Context Selection for Document-level Neural Machine Translation via Reinforcement Learning	BLEU	yes	no	no	no	n/a
743	EMNLP	2020	Data Rejuvenation: Exploiting Inactive Training Examples for Neural Machine Translation	BLEU	yes	no	no	no	n/a
744	EMNLP	2020	Learning Adaptive Segmentation Policy for Simultaneous Translation	BLEU	no	yes	no	no	n/a
745	EMNLP	2020	Simultaneous Machine Translation with Visual Context	BLEU	no	no	no	yes	n/a
746	EMNLP	2020	Bridging Linguistic Typology and Multilingual Machine Translation with Multi-View Language Representations	BLEU	no	no	no	yes	n/a
747	EMNLP	2020	Self-Induced Curriculum Learning in Self-Supervised Neural Machine Translation	BLEU, METEOR, TER	yes	no	yes	no	no
748	EMNLP	2020	Direct Segmentation Models for Streaming Speech Translation	BLEU	no	no	no	no	n/a
749	EMNLP	2020	Not Low-Resource Anymore: Aligner Ensembling, Batch Filtering, and New Datasets for Bengali-English Machine Translation	BLEU	no	no	yes	yes	no
750	EMNLP	2020	CSP:Code-Switching Pre-training for Neural Machine Translation	BLEU	no	no	yes	no	no
751	EMNLP	2020	Pre-training Multilingual Neural Machine Translation by Leveraging Alignment Information	BLEU	no	no	yes	yes	no
752	EMNLP	2020	Towards Enhancing Faithfulness for Neural Machine Translation	BLEU	yes	yes	yes	yes	no
753	EMNLP	2020	Uncertainty-Aware Semantic Augmentation for Neural Machine Translation	BLEU	no	no	yes	no	no
754	EMNLP	2020	Monolingual Adapters for Zero-Shot Neural Machine Translation	BLEU	no	no	yes	yes	no
755	EMNLP	2020	Distilling Multiple Domains for Neural Machine Translation	BLEU	yes	no	no	yes	n/a
756	EMNLP	2020	An Empirical Study of Generation Order for Machine Translation	BLEU	no	no	yes	yes	no
757	EMNLP	2020	Inference Strategies for Machine Translation with Conditional Masking	BLEU	no	no	no	yes	n/a
758	EMNLP	2020	Iterative Domain-Repaired Back-Translation	BLEU	no	no	no	yes	n/a
759	EMNLP	2020	Dynamic Data Selection and Weighting for Iterative Back-Translation	BLEU	yes	no	no	no	n/a
760	EMNLP	2020	Language Model Prior for Low-Resource Neural Machine Translation	BLEU	no	no	no	yes	n/a
761	EMNLP	2020	Effectively pretraining a speech translation decoder with Machine Translation data	BLEU	no	no	no	no	n/a
762	EMNLP	2020	Losing Heads in the Lottery: Pruning Transformer Attention in Neural Machine Translation	BLEU	no	no	no	no	n/a
763	EMNLP	2020	PyMT5: multi-mode translation of natural language and Python code with transformers	BLEU	no	no	yes	no	no
764	EMNLP	2020	Pronoun-Targeted Fine-tuning for NMT with Hybrid Losses	BLEU	yes	no	no	no	n/a
765	EMNLP	2020	Towards Reasonably-Sized Character-Level Transformer NMT by Finetuning Subword Systems	BLEU, chrF, METEOR	no	no	no	yes	n/a
766	EMNLP	2020	Reusing a Pretrained Language Model on Languages with Limited Corpora for Unsupervised NMT	BLEU	no	no	no	yes	n/a
767	EMNLP	2020	Can Automatic Post-Editing Improve NMT?	BLEU, chrF, TER	yes	yes	no	yes	n/a
768	EMNLP	2020	Revisiting Modularized Multilingual NMT to Meet Industrial Demands	BLEU	no	no	no	yes	n/a
769	EMNLP	2020	Imitation Attacks and Defenses for Black-box Machine Translation Systems	BLEU	no	no	no	yes	n/a
